# Supplementary material
Source: publisher figshare collection journal article supplement (https://tandf.figshare.com/ndownloader/files/22114212)

**Table S1.** Information of sampling country, population (Pop.) abbreviation (abb.) name, sample size, location, coordinate, and site description. adj., adjoined; Mt., mountain. Each population name was abbreviated (Wenzhou [WZ], Yancheng [YC], Fukuoka [FK], Tsushima Island [TS], Innoshima Island [IS], Kyoto [KT], Busan near Namsung Girls’ High School [NS], Busan near Computer High School [CP], Busan Natural History Museum [NH], Kimhae [KH], and Mokpo [MP]).

| Country  Pop. abb. | | Sample size | Location | Coordinate | Site description |
| --- | --- | --- | --- | --- | --- |
| China | WZ | 29 | Wenzhou | 27.76N, 120.60E | Suburban town |
| YC | 26 | Yancheng | 33.28N, 120.03E | Suburban town |
| Japan | FK | 35 | Fukuoka | 33.59N, 130.38E | City park |
| TS | 33 | Tsushima Island | 34.66N, 129.47E | Town adj. Mt. |
| IS | 37 | Innoshima Island | 34.28N, 133.18E | Town adj. Mt. |
| KT | 31 | Kyoto | 34.99N, 135.75E | City park |
| Korea | NS | 35 | Namsung Girls` High School in Busan | 35.11N, 129.03E | Downtown  adj. Mt. |
| CP | 34 | Computer Science High School in Busan | 35.12N, 129.03E | Downtown  adj. Mt. |
| NH | 28 | Marine Natural History Museum in Busan | 35.22N, 129.07E | Downtown  adj. Mt. |
| KH | 34 | Kimhae | 35.33N, 128.76E | Town adj. Mt. |
| MP | 31 | Mokpo | 34.79N, 126.39E | Downtown |
| Total | | 353 |  |  |  |

**Table S2.** Mitochondrial DNA haplotypes using concatenated *Cytb* and *ND2* haplotypes and GenBank accession numbers for each haplotype.

| mtDNA concatenated sequence haplotype | *Cytb* haplotype  GenBank Accession Numbers | *ND2* haplotype GenBank Accession Numbers |
| --- | --- | --- |
| Hap1 | MN811628 | MN811635 |
| Hap2 | MN811628 | MN811636 |
| Hap3 | MN811628 | MN811637 |
| Hap4 | MN811629 | MN811638 |
| Hap5 | MN811632 | MN811639 |
| Hap6 | MN811631 | MN811639 |
| Hap7 | MN811630 | MN811639 |
| Hap8 | MN811628 | MN811639 |
| Hap9 | MN811629 | MN811639 |
| Hap10 | MN811628 | MN811640 |
| Hap11 | MN811628 | MN811641 |
| Hap12 | MN811633 | MN811641 |
| Hap13 | MN811634 | MN811641 |
| Hap14 | MN811628 | MN811642 |
| Hap15 | MN811628 | MN811643 |
| Hap16 | MN811628 | MN811644 |

**Table S3**. Individual information for each *Gekko japonicus* used in this study with locations, mtDNA haplotypes and microsatellite genotypes. Each population name was abbreviated (Wenzhou [WZ], Yancheng [YC], Fukuoka [FK], Tsushima Island [TS], Innoshima Island [IS], Kyoto [KT], Busan near Namsung Girls’ High School [NS], Busan near Computer High School [CP], Busan Natural History Museum [NH], Kimhae [KH], and Mokpo [MP]).

| Country | Population | Individual ID | mtDNA  haplotype | Microsatellite genotype/ markers | | | | | | |
| --- | --- | --- | --- | --- | --- | --- | --- | --- | --- | --- |
| GJ04 | GJ06 | GJ12 | GJ16 | GJ18 | GJ21 | GJ22 |
| China | WZ | W1 | Hap8 | 106110 | 154154 | 217217 | 191193 | 163163 | 166166 | 156156 |
| China | WZ | W2 | Hap11 | 106106 | 154160 | 215215 | 193199 | 163165 | 163166 | 176184 |
| China | WZ | W3 | Hap4 | 106110 | 154160 | 215219 | 193193 | 163163 | 163166 | 156176 |
| China | WZ | W4 | Hap8 | 106106 | 154154 | 215217 | 193195 | 163163 | 163166 | 156176 |
| China | WZ | W5 | Hap11 | 106110 | 160160 | 215219 | 191195 | 163169 | 163166 | 156176 |
| China | WZ | W6 | Hap9 | 106110 | 160160 | 215215 | 191199 | 163169 | 163163 | 156176 |
| China | WZ | W7 | Hap9 | 106110 | 154160 | 215219 | 191199 | 163163 | 163166 | 156176 |
| China | WZ | W8 | Hap10 | 106106 | 154154 | 221221 | 193193 | 163169 | 163166 | 176176 |
| China | WZ | W9 | Hap11 | 106110 | 154154 | 215219 | 193193 | 163163 | 160160 | 156156 |
| China | WZ | W10 | Hap11 | 106110 | 154160 | 215219 | 199199 | 163163 | 163166 | 156176 |
| China | WZ | W11 | Hap11 | 110110 | 154154 | 215215 | 193193 | 163163 | 160166 | 156156 |
| China | WZ | W12 | Hap9 | 110110 | 154160 | 215219 | 191199 | 169169 | 163163 | 156176 |
| China | WZ | W13 | Hap8 | 106106 | 160160 | 215219 | 193195 | 163163 | 160166 | 156182 |
| China | WZ | W14 | Hap11 | 110110 | 154160 | 215215 | 195195 | 163171 | 163163 | 156156 |
| China | WZ | W15 | Hap8 | 104106 | 156160 | 217219 | 193193 | 163163 | 160166 | 156156 |
| China | WZ | W16 | Hap11 | 106106 | 154154 | 215215 | 193199 | 163163 | 163163 | 156156 |
| China | WZ | W17 | Hap8 | 106106 | 154154 | 217217 | 191193 | 163163 | 160166 | 156156 |
| China | WZ | W19 | Hap8 | 106106 | 160160 | 215215 | 191193 | 163163 | 160166 | 156182 |
| China | WZ | W20 | Hap11 | 106106 | 154154 | 215215 | 191191 | 163169 | 160163 | 156156 |
| China | WZ | W22 | Hap11 | 106106 | 154160 | 215215 | 193199 | 163163 | 160163 | 156156 |
| China | WZ | W23 | Hap7 | 106110 | 154154 | 215215 | 191195 | 163163 | 160166 | 156156 |
| China | WZ | W24 | Hap11 | 106106 | 154154 | 215215 | 191191 | 163169 | 163163 | 156156 |
| China | WZ | W25 | Hap11 | 106110 | 154160 | 219219 | 193193 | 163165 | 163166 | 156156 |
| China | WZ | W26 | Hap5 | 106106 | 160160 | 219219 | 199199 | 163163 | 163163 | 156156 |
| China | WZ | W28 | Hap9 | 110110 | 154160 | 215215 | 191199 | 163163 | 163163 | 156176 |
| China | WZ | W29 | Hap11 | 106110 | 154154 | 215219 | 191193 | 165165 | 160163 | 156156 |
| China | WZ | W30 | Hap9 | 106106 | 154160 | 215219 | 191193 | 163163 | 163163 | 156176 |
| China | WZ | W31 | Hap5 | 106106 | 154160 | 215219 | 191199 | 163163 | 163166 | 156176 |
| China | WZ | W32 | Hap10 | 106110 | 154154 | 215219 | 191199 | 163169 | 163163 | 156176 |
| China | YC | Y1 | Hap10 | 104110 | 154154 | 219219 | 193193 | 163171 | 163163 | 156156 |
| China | YC | Y2 | Hap12 | 104106 | 160160 | 215219 | 193193 | 165169 | 160163 | 156156 |
| China | YC | Y5 | Hap10 | 106106 | 154154 | 219221 | 193193 | 163163 | 160163 | 156156 |
| China | YC | Y7 | Hap6 | 106110 | 154154 | 215217 | 191193 | 163163 | 160163 | 156176 |
| China | YC | Y8 | Hap8 | 104106 | 154160 | 215215 | 189191 | 165171 | 163163 | 156156 |
| China | YC | Y9 | Hap2 | 104104 | 154160 | 217219 | 193193 | 169171 | 160160 | 156156 |
| China | YC | Y10 | Hap12 | 104106 | 154160 | 215221 | 193193 | 165169 | 160163 | 156156 |
| China | YC | Y11 | Hap8 | 104106 | 154154 | 219219 | 195195 | 171171 | 160166 | 156156 |
| China | YC | Y12 | Hap8 | 106106 | 154154 | 215215 | 191193 | 163165 | 160163 | 156156 |
| China | YC | Y13 | Hap10 | 106106 | 154154 | 215221 | 199199 | 169169 | 160163 | 176176 |
| China | YC | Y14 | Hap10 | 106106 | 154154 | 219221 | 193193 | 163169 | 163163 | 176176 |
| China | YC | Y15 | Hap8 | 106110 | 154154 | 215217 | 191193 | 163171 | 160163 | 156176 |
| China | YC | Y16 | Hap10 | 104106 | 154154 | 219221 | 191199 | 169171 | 163166 | 156156 |
| China | YC | Y19 | Hap8 | 106106 | 154154 | 215215 | 191195 | 169171 | 163163 | ?????? |
| China | YC | Y20 | Hap10 | 104106 | 154154 | 215219 | 193199 | 163163 | 163166 | 156176 |
| China | YC | Y22 | Hap10 | 106110 | 154154 | 215219 | 193193 | 169169 | 163166 | 176184 |
| China | YC | Y23 | Hap10 | 106106 | 154154 | 219221 | 193199 | 163169 | 163163 | 156156 |
| China | YC | Y24 | Hap8 | 104106 | 154160 | 217217 | 191195 | 163169 | 163166 | 156156 |
| China | YC | Y25 | Hap10 | 104104 | 154154 | 215221 | 193193 | 163169 | 163163 | 176176 |
| China | YC | Y26 | Hap3 | 106110 | 154156 | 217217 | 193195 | 163165 | 160163 | 156156 |
| China | YC | Y27 | Hap8 | 106106 | 154160 | 215217 | 191193 | 163165 | 160163 | 156182 |
| China | YC | Y28 | Hap15 | 106106 | 154160 | 215215 | 189191 | 163171 | 160160 | 156156 |
| China | YC | Y29 | Hap15 | 104110 | 154154 | 215217 | 189193 | 171171 | 163163 | ?????? |
| China | YC | Y30 | Hap9 | 106106 | 160160 | 215215 | 189191 | 163163 | 160163 | 156172 |
| China | YC | Y31 | Hap10 | 104106 | 154154 | 219221 | 191193 | 163163 | 160166 | 156176 |
| China | YC | Y32 | Hap10 | 104104 | 154154 | 215219 | 193199 | 163163 | 160163 | 156156 |
| Japan | FK | F1 | Hap11 | 106106 | 154160 | 215215 | 193193 | 163163 | 160163 | 156156 |
| Japan | FK | F3 | Hap11 | 106106 | 154154 | 219219 | 193193 | 163171 | 163163 | 156156 |
| Japan | FK | F7 | Hap10 | 106106 | 154154 | 215215 | 191193 | 163171 | 160163 | 156156 |
| Japan | FK | F9 | Hap11 | 106106 | 160160 | 215217 | 193193 | 163171 | 163163 | 156176 |
| Japan | FK | F10 | Hap11 | 106106 | 154160 | 215219 | 191191 | 169171 | 163163 | 176176 |
| Japan | FK | F11 | Hap11 | 104106 | 154160 | 215215 | 191193 | 163171 | 163163 | 156176 |
| Japan | FK | F15 | Hap11 | 106106 | 154154 | 215219 | 193193 | 165171 | 163163 | 156156 |
| Japan | FK | F16 | Hap11 | 106106 | 154154 | 215219 | 191193 | 171171 | 160163 | 176176 |
| Japan | FK | F18 | Hap11 | 104106 | 160160 | 219221 | 193193 | 171171 | 163163 | 156156 |
| Japan | FK | F19 | Hap11 | 106106 | 160160 | 215219 | 193193 | 163169 | 163163 | 156176 |
| Japan | FK | F20 | Hap11 | 106110 | 154154 | 215215 | 191193 | 163171 | 163163 | 156178 |
| Japan | FK | F24 | Hap10 | 106110 | 160160 | 215219 | 193193 | 163165 | 163166 | 156156 |
| Japan | FK | F27 | Hap11 | 106106 | 154160 | 215221 | 193193 | 165171 | 160163 | 156156 |
| Japan | FK | F29 | Hap10 | 106110 | 160160 | 215215 | 191193 | 163171 | 160163 | 156156 |
| Japan | FK | F30 | Hap11 | 104106 | 154154 | 215215 | 193193 | 163171 | 163163 | 156156 |
| Japan | FK | F32 | Hap11 | 106106 | 154160 | 215215 | 193193 | 163171 | 160160 | 156156 |
| Japan | FK | F34 | Hap11 | 106106 | 154160 | 215219 | 191191 | 165165 | 160160 | 156156 |
| Japan | FK | F35 | Hap11 | 106106 | 160160 | 215215 | 193193 | 165171 | 160160 | 156176 |
| Japan | FK | F38 | Hap8 | 106106 | 154160 | 215219 | 193195 | 163165 | 163163 | 156156 |
| Japan | FK | F39 | Hap11 | 106106 | 154154 | 215217 | 191193 | 165171 | 160163 | 156176 |
| Japan | FK | F43 | Hap11 | 106110 | 154160 | 215219 | 193193 | 163171 | 163163 | 156156 |
| Japan | FK | F44 | Hap11 | 106106 | 154154 | 217219 | 193193 | 163171 | 160163 | 156156 |
| Japan | FK | F52 | Hap10 | 106106 | 154154 | 215217 | 193193 | 163171 | 163163 | 156156 |
| Japan | FK | F53 | Hap11 | 106106 | 154154 | 215217 | 193195 | 163163 | 160160 | 156156 |
| Japan | FK | F54 | Hap11 | 106106 | 154154 | 215219 | 193193 | 163163 | 160160 | 156156 |
| Japan | FK | F55 | Hap11 | 106106 | 154160 | 215215 | 193193 | 163163 | 160163 | 156156 |
| Japan | FK | F57 | Hap11 | 106106 | 154160 | 215217 | 193195 | 165165 | 160163 | 156156 |
| Japan | FK | F59 | Hap11 | 106106 | 154154 | 215217 | 191193 | 163171 | 160163 | 156176 |
| Japan | FK | F61 | Hap14 | 106106 | 154154 | 215215 | 191193 | 163163 | 163163 | 156156 |
| Japan | FK | F62 | Hap11 | 106106 | 154154 | 215215 | 191191 | 165171 | 160163 | 156176 |
| Japan | FK | F63 | Hap8 | 106110 | 154160 | 215217 | 191193 | 165171 | 160160 | 156156 |
| Japan | FK | F68 | Hap11 | 106106 | 154160 | 215219 | 191193 | 163163 | 160163 | 156156 |
| Japan | FK | F69 | Hap10 | 106106 | 154154 | 215217 | 193195 | 165171 | 160160 | 156156 |
| Japan | FK | F70 | Hap11 | 106106 | 154154 | 215215 | 193195 | 163165 | 163163 | 156156 |
| Japan | FK | F71 | Hap10 | 106106 | 154160 | 215217 | 191191 | 165171 | 160163 | 156176 |
| Japan | TS | T1 | Hap8 | 106106 | 154160 | 215219 | 193193 | 163165 | 166166 | 156176 |
| Japan | TS | T2 | Hap11 | 106106 | 154160 | 215219 | 191193 | 163165 | 163163 | 156156 |
| Japan | TS | T3 | Hap11 | 106106 | 160160 | 215217 | 191193 | 163163 | 163163 | 156156 |
| Japan | TS | T4 | Hap11 | 106106 | 154154 | 215219 | 191193 | 163163 | 160163 | 156156 |
| Japan | TS | T5 | Hap11 | 106106 | 154160 | 215221 | 191193 | 163165 | 160166 | 156176 |
| Japan | TS | T6 | Hap8 | 106106 | 154160 | 217219 | 193193 | 163171 | 160163 | 156156 |
| Japan | TS | T7 | Hap11 | 106106 | 154160 | 215219 | 193193 | 163171 | 160163 | 156156 |
| Japan | TS | T8 | Hap11 | 106106 | 154154 | 215219 | 191195 | 165165 | 163166 | 156176 |
| Japan | TS | T9 | Hap10 | 106106 | 160160 | 215219 | 191193 | 165165 | 160163 | 156176 |
| Japan | TS | T10 | Hap11 | 106106 | 160160 | 215219 | 193193 | 163171 | 160163 | 156176 |
| Japan | TS | T11 | Hap11 | 106106 | 154160 | 215219 | 193193 | 163163 | 160163 | 156176 |
| Japan | TS | T12 | Hap11 | 106106 | 154154 | 215221 | 191195 | 163165 | 163163 | 156156 |
| Japan | TS | T13 | Hap11 | 106106 | 154154 | 215217 | 191193 | 163165 | 163163 | 156156 |
| Japan | TS | T14 | Hap11 | 106106 | 154154 | 215219 | 193193 | 163165 | 160166 | 156176 |
| Japan | TS | T15 | Hap11 | 106106 | 160160 | 215219 | 191193 | 163163 | 163166 | 156156 |
| Japan | TS | T16 | Hap11 | 106106 | 154154 | 215219 | 191193 | 163163 | 163166 | 156156 |
| Japan | TS | T17 | Hap11 | 106106 | 154160 | 215219 | 191193 | 163163 | 163163 | 156156 |
| Japan | TS | T18 | Hap11 | 106106 | 154154 | 215219 | 191193 | 163171 | 163163 | 156156 |
| Japan | TS | T19 | Hap11 | 106106 | 154154 | 215219 | 191193 | 163171 | 166166 | 156176 |
| Japan | TS | T20 | Hap11 | 106106 | 154160 | 215219 | 193193 | 165165 | 163166 | 156156 |
| Japan | TS | T21 | Hap11 | 106106 | 154160 | 215219 | 193193 | 163165 | 166166 | 156176 |
| Japan | TS | T22 | Hap11 | 106106 | 154160 | 215219 | 193193 | 163171 | 163163 | 156176 |
| Japan | TS | T23 | Hap11 | 106106 | 154160 | 215219 | 193195 | 163165 | 160163 | 156156 |
| Japan | TS | T24 | Hap11 | 106106 | 154160 | 215219 | 193193 | 163165 | 160163 | 156176 |
| Japan | TS | T25 | Hap11 | 106106 | 154160 | 215219 | 191193 | 163171 | 163163 | 156156 |
| Japan | TS | T26 | Hap11 | 106106 | 154160 | 215219 | 193193 | 163163 | 163166 | 156156 |
| Japan | TS | T27 | Hap11 | 106106 | 154160 | 215219 | 193193 | 163171 | 160163 | 156156 |
| Japan | TS | T28 | Hap11 | 106106 | 154160 | 215219 | 193193 | 163171 | 163166 | 156176 |
| Japan | TS | T29 | Hap11 | 106106 | 160160 | 215219 | 193193 | 163163 | 163163 | 156156 |
| Japan | TS | T30 | Hap11 | 106106 | 154160 | 215219 | 193193 | 163163 | 163163 | 156176 |
| Japan | TS | T31 | Hap11 | 106106 | 160160 | 215219 | 193193 | 163165 | 160166 | 156176 |
| Japan | TS | T32 | Hap11 | 106106 | 154160 | 215219 | 193193 | 163171 | 160163 | 156156 |
| Japan | TS | T33 | Hap11 | 106108 | 160160 | 215219 | 191191 | 163165 | 163163 | 156156 |
| Japan | IS | I1 | Hap11 | 106106 | 154160 | 219219 | 193193 | 163171 | 160166 | 156156 |
| Japan | IS | I2 | Hap11 | 106108 | 160160 | 215215 | 193193 | 163163 | 160160 | 156176 |
| Japan | IS | I3 | Hap11 | 106106 | 160160 | 219219 | 191193 | 163163 | 163163 | 156156 |
| Japan | IS | I4 | Hap11 | 106106 | 154160 | 219219 | 191193 | 163171 | 163163 | 156156 |
| Japan | IS | I5 | Hap11 | 106106 | 154154 | 217219 | 193193 | 171171 | 163163 | 156156 |
| Japan | IS | I6 | Hap11 | 106106 | 154160 | 215217 | 193193 | 163171 | 163163 | 156176 |
| Japan | IS | I7 | Hap11 | 106106 | 160160 | 215217 | 193193 | 163171 | 163166 | 156156 |
| Japan | IS | I8 | Hap11 | 106106 | 160160 | 215219 | 193193 | 163163 | 163163 | 156156 |
| Japan | IS | I9 | Hap11 | 106106 | 154160 | 217217 | 191193 | 163163 | 163163 | 156156 |
| Japan | IS | I10 | Hap11 | 106108 | 160160 | 215219 | 191193 | 163171 | 160163 | 156156 |
| Japan | IS | I11 | Hap11 | 106106 | 154160 | 217217 | 191193 | 163163 | 163163 | 156156 |
| Japan | IS | I12 | Hap11 | 106106 | 154154 | 215221 | 193193 | 163171 | 163163 | 156176 |
| Japan | IS | I13 | Hap11 | 106106 | 160160 | 217219 | 193193 | 163171 | 160163 | 156176 |
| Japan | IS | I14 | Hap11 | 106106 | 154160 | 215219 | 193193 | 163171 | 160163 | 156156 |
| Japan | IS | I15 | Hap11 | 106108 | 154154 | 215217 | 193193 | 163163 | 160160 | 156176 |
| Japan | IS | I16 | Hap11 | 106106 | 154160 | 215217 | 193193 | 163163 | 163163 | 156176 |
| Japan | IS | I17 | Hap11 | 106106 | 154160 | 215215 | 191193 | 163171 | 163163 | 156156 |
| Japan | IS | I18 | Hap11 | 106106 | 154160 | 215215 | 193193 | 163163 | 163163 | 156156 |
| Japan | IS | I19 | Hap11 | 106106 | 160160 | 217217 | 193193 | 163171 | 163166 | 156156 |
| Japan | IS | I20 | Hap11 | 104108 | 154160 | 215215 | 193193 | 163171 | 163163 | 156156 |
| Japan | IS | I21 | Hap11 | 106106 | 160160 | 217217 | 193193 | 163171 | 163163 | 156156 |
| Japan | IS | I22 | Hap11 | 106106 | 154154 | 215217 | 191193 | 163163 | 163163 | 156156 |
| Japan | IS | I23 | Hap11 | 106106 | 160160 | 219219 | 193193 | 163171 | 160163 | 156156 |
| Japan | IS | I24 | Hap11 | 104106 | 154154 | 217217 | 193193 | 163163 | 163163 | 156176 |
| Japan | IS | I25 | Hap11 | 106106 | 154160 | 217219 | 193193 | 163171 | 160163 | 156156 |
| Japan | IS | I26 | Hap11 | 106106 | 154154 | 217219 | 191193 | 163163 | 160163 | 156172 |
| Japan | IS | I27 | Hap11 | 104108 | 154160 | 217217 | 191193 | 163163 | 160163 | 156176 |
| Japan | IS | I28 | Hap11 | 106106 | 160160 | 215215 | 193193 | 163163 | 163166 | 156156 |
| Japan | IS | I29 | Hap11 | 106106 | 154154 | 215215 | 193193 | 163163 | 160163 | 156156 |
| Japan | IS | I30 | Hap11 | 106106 | 154154 | 217217 | 193193 | 163163 | 163166 | 156156 |
| Japan | IS | I31 | Hap11 | 106106 | 154154 | 217219 | 193193 | 163163 | 163166 | 156176 |
| Japan | IS | I32 | Hap11 | 106106 | 154160 | 217217 | 193193 | 163163 | 163166 | 156156 |
| Japan | IS | I33 | Hap11 | 106106 | 154160 | 217219 | 193193 | 163163 | 163166 | 156176 |
| Japan | IS | I34 | Hap11 | 104106 | 154160 | 217219 | 193193 | 163171 | 160160 | 156156 |
| Japan | IS | I35 | Hap11 | 104106 | 154160 | 215219 | 191193 | 163171 | 163163 | 156156 |
| Japan | IS | I36 | Hap11 | 106106 | 154160 | 217217 | 193193 | 163171 | 160163 | 156176 |
| Japan | IS | I37 | Hap11 | 106106 | 154160 | 215217 | 193195 | 163171 | 163163 | 156156 |
| Japan | KT | Ky1 | Hap11 | 104106 | 154160 | 217217 | 191191 | 163163 | 163163 | 156176 |
| Japan | KT | Ky2 | Hap11 | 104106 | 154160 | 217217 | 193193 | 163171 | 160163 | 156176 |
| Japan | KT | Ky3 | Hap11 | 106106 | 154160 | 217219 | 193195 | 171171 | 163163 | 156176 |
| Japan | KT | Ky4 | Hap11 | 104106 | 154154 | 215215 | 191195 | 163163 | 160163 | 176176 |
| Japan | KT | Ky5 | Hap11 | 106106 | 160160 | 217219 | 191193 | 163171 | 160163 | 156156 |
| Japan | KT | Ky6 | Hap11 | 106106 | 154154 | 217219 | 191195 | 163163 | 163163 | 156176 |
| Japan | KT | Ky7 | Hap11 | 106108 | 154154 | 215217 | 191193 | 163171 | 163163 | 156156 |
| Japan | KT | Ky8 | Hap13 | 106108 | 154160 | 215217 | 193195 | 163163 | 160163 | 156156 |
| Japan | KT | Ky9 | Hap11 | 106106 | 160160 | 217219 | 193193 | 163171 | 163163 | 156156 |
| Japan | KT | Ky10 | Hap11 | 106106 | 160160 | 215217 | 195195 | 163163 | 163163 | 156176 |
| Japan | KT | Ky11 | Hap11 | 104106 | 154154 | 217217 | 193195 | 171171 | 160163 | 156176 |
| Japan | KT | Ky12 | Hap11 | 104106 | 154160 | 215217 | 193193 | 163171 | 160166 | 156156 |
| Japan | KT | Ky13 | Hap11 | 106106 | 160160 | 215217 | 191193 | 163171 | 163163 | 156176 |
| Japan | KT | Ky14 | Hap11 | 106106 | 160160 | 215219 | 191193 | 171171 | 163163 | 156176 |
| Japan | KT | Ky15 | Hap11 | 104106 | 160160 | 215217 | 193195 | 163163 | 163163 | 156176 |
| Japan | KT | Ky16 | Hap11 | 104106 | 160160 | 215219 | 191193 | 163171 | 163163 | 156156 |
| Japan | KT | Ky17 | Hap11 | 106106 | 154154 | 215217 | 193195 | 163163 | 163163 | 156176 |
| Japan | KT | Ky18 | Hap11 | 106106 | 154154 | 215217 | 191193 | 163171 | 163163 | 156156 |
| Japan | KT | Ky19 | Hap11 | 106106 | 154160 | 215217 | 193195 | 163163 | 160160 | 156156 |
| Japan | KT | Ky20 | Hap11 | 106106 | 154160 | 215217 | 191193 | 163163 | 163163 | 156176 |
| Japan | KT | Ky21 | Hap11 | 104104 | 154160 | 215215 | 193193 | 163171 | 163163 | 156156 |
| Japan | KT | Ky22 | Hap11 | 104106 | 154154 | 215215 | 193195 | 163171 | 163163 | 156176 |
| Japan | KT | Ky23 | Hap11 | 106106 | 154160 | 217217 | 191191 | 163171 | 163163 | 156176 |
| Japan | KT | Ky24 | Hap11 | 106106 | 154160 | 217217 | 193195 | 165171 | 163163 | 156156 |
| Japan | KT | Ky25 | Hap11 | 104106 | 154160 | 215217 | 193193 | 163163 | 163163 | 156176 |
| Japan | KT | Ky26 | Hap11 | 104106 | 154160 | 217219 | 193193 | 163171 | 163163 | 156176 |
| Japan | KT | Ky27 | Hap11 | 104106 | 160160 | 217217 | 193195 | 163171 | 160163 | 156156 |
| Japan | KT | Ky28 | Hap11 | 106106 | 154160 | 217219 | 193195 | 163163 | 160166 | 156156 |
| Japan | KT | Ky29 | Hap11 | 104106 | 154154 | 217219 | 191193 | 163171 | 160163 | 156156 |
| Japan | KT | Ky30 | Hap11 | 106108 | 154154 | 215219 | 193195 | 163163 | 160163 | 172176 |
| Japan | KT | Ky31 | Hap11 | 104106 | 154160 | 215215 | 193195 | 163171 | 163166 | 156176 |
| Korea | NS | Na1 | Hap10 | 106106 | 160160 | 215215 | 191193 | 163171 | 163163 | 156156 |
| Korea | NS | Na2 | Hap10 | 106106 | 154160 | 215215 | 193193 | 171171 | 160163 | 156156 |
| Korea | NS | Na3 | Hap10 | 106108 | 154160 | 215215 | 191193 | 165171 | 160163 | 156176 |
| Korea | NS | Na4 | Hap10 | 106106 | 154160 | 215215 | 191193 | 165171 | 163163 | 156156 |
| Korea | NS | Na5 | Hap10 | 106106 | 154160 | 215215 | 191193 | 163171 | 160163 | 156156 |
| Korea | NS | Na6 | Hap10 | 106106 | 154160 | 215215 | 193193 | 163171 | 163163 | 156156 |
| Korea | NS | Na7 | Hap10 | 106106 | 160160 | 215215 | 191193 | 163171 | 160163 | 156156 |
| Korea | NS | Na8 | Hap10 | 106106 | 154160 | 215217 | 191193 | 171171 | 160163 | 156176 |
| Korea | NS | Na9 | Hap11 | 106106 | 154160 | 215215 | 191191 | 163165 | 160160 | 156156 |
| Korea | NS | Na10 | Hap10 | 106106 | 154160 | 215215 | 191193 | 163165 | 160163 | 156176 |
| Korea | NS | Na12 | Hap10 | 106110 | 160160 | 215215 | 193193 | 163163 | 163163 | 156156 |
| Korea | NS | Na13 | Hap10 | 106106 | 160160 | 215215 | 191193 | 163171 | 160163 | 156156 |
| Korea | NS | Na14 | Hap10 | 106106 | 154160 | 215215 | 191193 | 163171 | 163163 | 156156 |
| Korea | NS | Na15 | Hap11 | 106106 | 154160 | 215215 | 193193 | 163171 | 160163 | 156176 |
| Korea | NS | Na16 | Hap10 | 106106 | 154160 | 215215 | 191193 | 165165 | 160160 | 156156 |
| Korea | NS | Na17 | Hap10 | 106108 | 160160 | 215215 | 191193 | 163165 | 160160 | 156156 |
| Korea | NS | Na18 | Hap10 | 106106 | 154160 | 215215 | 193193 | 163163 | 160160 | 156156 |
| Korea | NS | Na19 | Hap10 | 106108 | 160160 | 215217 | 193193 | 165165 | 163163 | 156176 |
| Korea | NS | Na20 | Hap10 | 106106 | 160160 | 215215 | 193193 | 163163 | 163163 | 156176 |
| Korea | NS | Na21 | Hap11 | 106106 | 160160 | 215215 | 193195 | 165165 | 163163 | 156156 |
| Korea | NS | Na22 | Hap10 | 108108 | 160160 | 215215 | 193193 | 163171 | 160163 | 156176 |
| Korea | NS | Na23 | Hap10 | 106106 | 154160 | 219219 | 193193 | 171171 | 163163 | 156156 |
| Korea | NS | Na24 | Hap10 | 106106 | 154154 | 215215 | 191193 | 163171 | 160160 | 156156 |
| Korea | NS | Na25 | Hap10 | 106106 | 154160 | 215215 | 193193 | 165165 | 160163 | 156156 |
| Korea | NS | Na26 | Hap10 | 106106 | 160160 | 215219 | 193193 | 163171 | 160163 | 156156 |
| Korea | NS | Na27 | Hap10 | 106106 | 154160 | 215219 | 193193 | 163163 | 160163 | 156156 |
| Korea | NS | Na28 | Hap10 | 106106 | 160160 | 215219 | 191193 | 163171 | 160160 | 156156 |
| Korea | NS | Na29 | Hap10 | 106106 | 154160 | 215215 | 193193 | 163171 | 160163 | 156176 |
| Korea | NS | Na30 | Hap10 | 106106 | 154160 | 215219 | 191193 | 163165 | 160163 | 156156 |
| Korea | NS | Na31 | Hap10 | 106106 | 160160 | 215219 | 193195 | 163163 | 160160 | 156156 |
| Korea | NS | Na32 | Hap10 | 106106 | 154160 | 215215 | 191191 | 163171 | 163163 | 156156 |
| Korea | NS | Na33 | Hap10 | 106106 | 160160 | 215215 | 191193 | 163171 | 160160 | 156156 |
| Korea | NS | Na34 | Hap10 | 106106 | 154160 | 215217 | 193193 | 171171 | 163163 | 156156 |
| Korea | NS | Na35 | Hap10 | 106106 | 154160 | 215217 | 193193 | 165171 | 160163 | 156156 |
| Korea | NS | Na36 | Hap10 | 106106 | 160160 | 215215 | 193193 | 163165 | 163163 | 156156 |
| Korea | CP | C1 | Hap10 | 106106 | 154160 | 215215 | 193193 | 163163 | 163163 | 156156 |
| Korea | CP | C2 | Hap10 | 106108 | 154160 | 215215 | 193193 | 163165 | 160163 | 156156 |
| Korea | CP | C3 | Hap10 | 106108 | 154160 | 215219 | 193193 | 163163 | 163163 | 156156 |
| Korea | CP | C4 | Hap10 | 106106 | 154160 | 215215 | 193193 | 163163 | 160163 | 156156 |
| Korea | CP | C5 | Hap10 | 106106 | 154160 | 215215 | 193193 | 163171 | 163163 | 156156 |
| Korea | CP | C6 | Hap10 | 106106 | 154160 | 215219 | 191193 | 163163 | 163163 | 156156 |
| Korea | CP | C7 | Hap10 | 106108 | 154160 | 215219 | 193193 | 163163 | 160163 | 156156 |
| Korea | CP | C8 | Hap10 | 106106 | 160160 | 215215 | 193193 | 163171 | 160163 | 156156 |
| Korea | CP | C9 | Hap10 | 106106 | 154160 | 215219 | 191193 | 171171 | 160160 | 156156 |
| Korea | CP | C10 | Hap10 | 106108 | 160160 | 215215 | 193193 | 163163 | 160163 | 156156 |
| Korea | CP | C11 | Hap10 | 106106 | 160160 | 215219 | 193193 | 163163 | 160160 | 156156 |
| Korea | CP | C12 | Hap10 | 106106 | 154160 | 215219 | 191193 | 163171 | 163163 | 156156 |
| Korea | CP | C13 | Hap10 | 106106 | 154160 | 215219 | 193193 | 163163 | 160163 | 156156 |
| Korea | CP | C14 | Hap10 | 106106 | 154160 | 215215 | 191193 | 165171 | 160163 | 156156 |
| Korea | CP | C15 | Hap10 | 106106 | 160160 | 215217 | 193193 | 171171 | 160163 | 156156 |
| Korea | CP | C16 | Hap10 | 106108 | 154160 | 215219 | 193193 | 163165 | 160163 | 156156 |
| Korea | CP | C17 | Hap11 | 106106 | 154160 | 215215 | 193193 | 163163 | 160163 | 156156 |
| Korea | CP | C18 | Hap11 | 106106 | 154160 | 215215 | 193193 | 163171 | 160163 | 156156 |
| Korea | CP | C19 | Hap10 | 106106 | 154160 | 215215 | 193193 | 163163 | 160163 | 156156 |
| Korea | CP | C20 | Hap10 | 106106 | 154160 | 215215 | 193193 | 163165 | 163163 | 156156 |
| Korea | CP | C21 | Hap10 | 106108 | 154160 | 215215 | 193193 | 163165 | 163163 | 156156 |
| Korea | CP | C22 | Hap10 | 106106 | 154160 | 215215 | 191193 | 163171 | 163163 | 156156 |
| Korea | CP | C23 | Hap10 | 106108 | 154160 | 219219 | 191193 | 163163 | 160163 | 156156 |
| Korea | CP | C24 | Hap10 | 106106 | 154160 | 215219 | 191193 | 163163 | 163163 | 156156 |
| Korea | CP | C25 | Hap10 | 106106 | 154160 | 215215 | 193193 | 163163 | 160163 | 156156 |
| Korea | CP | C26 | Hap10 | 106106 | 154160 | 215215 | 193193 | 165165 | 160163 | 156156 |
| Korea | CP | C27 | Hap10 | 106106 | 154160 | 215215 | 193193 | 163171 | 160163 | 156156 |
| Korea | CP | C28 | Hap11 | 106106 | 154160 | 215215 | 193193 | 163163 | 160163 | 156156 |
| Korea | CP | C30 | Hap10 | 106106 | 154160 | 215219 | 191193 | 165165 | 163163 | 156156 |
| Korea | CP | C31 | Hap10 | 106108 | 160160 | 219219 | 193193 | 163163 | 160163 | 156156 |
| Korea | CP | C32 | Hap11 | 106108 | 154160 | 215219 | 193193 | 163171 | 160160 | 156156 |
| Korea | CP | C33 | Hap10 | 106106 | 154160 | 215215 | 191193 | 165165 | 163163 | 156156 |
| Korea | CP | C34 | Hap10 | 106108 | 154160 | 215215 | 191193 | 163163 | 160163 | 156156 |
| Korea | CP | C35 | Hap10 | 106106 | 154160 | 215215 | 193193 | 163163 | 160163 | 156156 |
| Korea | NH | N1 | Hap10 | 106106 | 160160 | 215215 | 193193 | 163163 | 163163 | 156156 |
| Korea | NH | N2 | Hap10 | 106106 | 160160 | 215215 | 191193 | 163171 | 163163 | 156156 |
| Korea | NH | N3 | Hap10 | 106106 | 154160 | 215215 | 191193 | 163171 | 163163 | 156156 |
| Korea | NH | N4 | Hap1 | 106106 | 160160 | 215219 | 191193 | 163163 | 163163 | 156176 |
| Korea | NH | N5 | Hap10 | 106106 | 160160 | 215219 | 191193 | 163163 | 160163 | 156156 |
| Korea | NH | N6 | Hap1 | 106106 | 154160 | 215219 | 191193 | 163163 | 160163 | 156156 |
| Korea | NH | N7 | Hap10 | 106106 | 154160 | 219219 | 193193 | 163163 | 163163 | 156156 |
| Korea | NH | N8 | Hap11 | 106106 | 160160 | 215219 | 191193 | 163165 | 160160 | 156156 |
| Korea | NH | N9 | Hap10 | 106106 | 160160 | 215215 | 193195 | 163171 | 160163 | 156156 |
| Korea | NH | N10 | Hap11 | 106106 | 160160 | 215215 | 193193 | 163163 | 163163 | 156156 |
| Korea | NH | N11 | Hap10 | 106106 | 160160 | 219219 | 193193 | 163171 | 163163 | 156156 |
| Korea | NH | N12 | Hap10 | 106106 | 154160 | 215219 | 191193 | 163163 | 163163 | 156156 |
| Korea | NH | N13 | Hap10 | 106106 | 154160 | 215215 | 191193 | 163171 | 163163 | 156156 |
| Korea | NH | N14 | Hap10 | 106106 | 160160 | 215219 | 193193 | 163163 | 163163 | 156156 |
| Korea | NH | N15 | Hap11 | 106106 | 160160 | 219219 | 191193 | 163171 | 163163 | 156156 |
| Korea | NH | N16 | Hap10 | 106106 | 160160 | 215219 | 191193 | 163163 | 160163 | 156156 |
| Korea | NH | N17 | Hap10 | 106106 | 160160 | 219219 | 191193 | 163163 | 160163 | 156156 |
| Korea | NH | N18 | Hap11 | 106106 | 154160 | 219219 | 191193 | 163171 | 163163 | 156176 |
| Korea | NH | N19 | Hap10 | 106106 | 160160 | 219219 | 191193 | 163171 | 160163 | 156156 |
| Korea | NH | N21 | Hap10 | 106106 | 160160 | 215215 | 191193 | 163171 | 163163 | 156156 |
| Korea | NH | N22 | Hap10 | 106106 | 160160 | 219219 | 191193 | 163163 | 160163 | 156156 |
| Korea | NH | N23 | Hap11 | 106106 | 160160 | 215219 | 191193 | 163165 | 163163 | 156156 |
| Korea | NH | N24 | Hap10 | 106106 | 160160 | 215219 | 191191 | 163163 | 163163 | 156156 |
| Korea | NH | N25 | Hap10 | 106106 | 160160 | 219219 | 191193 | 163163 | 160160 | 156156 |
| Korea | NH | N26 | Hap11 | 106106 | 160160 | 215215 | 193193 | 163163 | 163163 | 156176 |
| Korea | NH | N27 | Hap10 | 106106 | 160160 | 215219 | 193193 | 163163 | 160163 | 156156 |
| Korea | NH | N28 | Hap10 | 106106 | 160160 | 215215 | 191191 | 163165 | 160163 | 156156 |
| Korea | NH | N29 | Hap10 | 106106 | 160160 | 215219 | 191193 | 163165 | 163163 | 156156 |
| Korea | KH | K1 | Hap10 | 106106 | 154160 | 215215 | 193193 | 171171 | 160163 | 156156 |
| Korea | KH | K2 | Hap10 | 106106 | 154154 | 215215 | 193193 | 171171 | 160163 | 156156 |
| Korea | KH | K3 | Hap10 | 106106 | 154154 | 215215 | 193193 | 163171 | 160160 | 156156 |
| Korea | KH | K4 | Hap10 | 106106 | 154154 | 215215 | 193193 | 163163 | 160160 | 156156 |
| Korea | KH | K5 | Hap10 | 106106 | 154154 | 215215 | 193193 | 163171 | 160163 | 156176 |
| Korea | KH | K6 | Hap10 | 106106 | 154154 | 215215 | 193193 | 163171 | 163163 | 156176 |
| Korea | KH | K7 | Hap10 | 106106 | 154160 | 215215 | 193193 | 163171 | 160163 | 156176 |
| Korea | KH | K8 | Hap10 | 106106 | 154160 | 215215 | 193193 | 163171 | 160160 | 156156 |
| Korea | KH | K9 | Hap10 | 106106 | 154154 | 215215 | 193193 | 163171 | 160160 | 156176 |
| Korea | KH | K10 | Hap10 | 106106 | 154160 | 215215 | 193193 | 163171 | 160163 | 156176 |
| Korea | KH | K11 | Hap10 | 106106 | 154154 | 215215 | 193193 | 163171 | 160163 | 156156 |
| Korea | KH | K12 | Hap10 | 106106 | 154160 | 215215 | 193193 | 163163 | 163163 | 156176 |
| Korea | KH | K13 | Hap10 | 106106 | 154154 | 215215 | 193193 | 163163 | 160163 | 156156 |
| Korea | KH | K14 | Hap10 | 106106 | 154160 | 215215 | 193193 | 171171 | 163163 | 156156 |
| Korea | KH | K15 | Hap10 | 106106 | 154160 | 215215 | 193193 | 171171 | 160163 | 156176 |
| Korea | KH | K16 | Hap10 | 106106 | 154160 | 215215 | 193193 | 171171 | 160163 | 156156 |
| Korea | KH | K17 | Hap10 | 106106 | 154154 | 215215 | 193193 | 163171 | 160160 | 156176 |
| Korea | KH | K18 | Hap16 | 106106 | 154160 | 215215 | 193193 | 171171 | 160160 | 156176 |
| Korea | KH | K19 | Hap10 | 106106 | 154160 | 215215 | 193193 | 171171 | 160163 | 156156 |
| Korea | KH | K20 | Hap10 | 106106 | 154154 | 215215 | 193193 | 171171 | 163163 | 156176 |
| Korea | KH | K21 | Hap10 | 106106 | 154154 | 215215 | 193193 | 171171 | 160163 | 156156 |
| Korea | KH | K22 | Hap10 | 106106 | 154154 | 215215 | 193193 | 171171 | 163163 | 156156 |
| Korea | KH | K23 | Hap10 | 106106 | 154154 | 215215 | 193193 | 163163 | 160163 | 156156 |
| Korea | KH | K24 | Hap10 | 106106 | 154154 | 215215 | 193193 | 163171 | 163163 | 156156 |
| Korea | KH | K25 | Hap10 | 106106 | 154154 | 215215 | 193193 | 171171 | 160163 | 156156 |
| Korea | KH | K26 | Hap10 | 106106 | 154154 | 215215 | 193193 | 171171 | 160163 | 156176 |
| Korea | KH | K27 | Hap10 | 106106 | 154154 | 215215 | 193193 | 163163 | 163163 | 156176 |
| Korea | KH | K28 | Hap10 | 106106 | 154154 | 215215 | 193193 | 163171 | 160163 | 156156 |
| Korea | KH | K29 | Hap10 | 106106 | 154160 | 215215 | 193193 | 171171 | 163163 | 176176 |
| Korea | KH | K30 | Hap10 | 106106 | 154154 | 215215 | 193193 | 163171 | 163163 | 176176 |
| Korea | KH | K31 | Hap10 | 106106 | 154154 | 215215 | 193193 | 171171 | 160160 | 156176 |
| Korea | KH | K32 | Hap10 | 106106 | 154160 | 215215 | 193193 | 171171 | 160163 | 156156 |
| Korea | KH | K33 | Hap10 | 106106 | 154160 | 215215 | 193193 | 171171 | 160160 | 156176 |
| Korea | KH | K34 | Hap10 | 106106 | 154160 | 215215 | 193193 | 163171 | 160160 | 156176 |
| Korea | MP | M1 | Hap11 | 106106 | 154160 | 215217 | 193193 | 163163 | 163163 | 156156 |
| Korea | MP | M2 | Hap11 | 106106 | 154160 | 215217 | 193193 | 163169 | 163163 | 156176 |
| Korea | MP | M3 | Hap11 | 106106 | 154160 | 217217 | 193193 | 171171 | 163163 | 156176 |
| Korea | MP | M4 | Hap11 | 106106 | 154160 | 217217 | 193193 | 163171 | 163163 | 156156 |
| Korea | MP | M5 | Hap11 | 106106 | 154160 | 217217 | 193193 | 163165 | 163163 | 156156 |
| Korea | MP | M6 | Hap11 | 106106 | 154160 | 217217 | 193193 | 163163 | 163163 | 156176 |
| Korea | MP | M7 | Hap11 | 104106 | 154160 | 217217 | 193193 | 163171 | 163163 | 156156 |
| Korea | MP | M8 | Hap11 | 106106 | 154160 | 217217 | 193193 | 163171 | 163163 | 156176 |
| Korea | MP | M9 | Hap11 | 106106 | 154160 | 217217 | 193193 | 163163 | 163163 | 156156 |
| Korea | MP | M10 | Hap11 | 106106 | 154160 | 217217 | 191193 | 163169 | 163163 | 156176 |
| Korea | MP | M11 | Hap11 | 106106 | 154160 | 217217 | 193193 | 163163 | 163163 | 156156 |
| Korea | MP | M12 | Hap11 | 106106 | 154160 | 217217 | 193193 | 165171 | 163163 | 156156 |
| Korea | MP | M13 | Hap11 | 106106 | 154160 | 217217 | 193193 | 171171 | 163163 | 156176 |
| Korea | MP | M14 | Hap11 | 106106 | 154160 | 215217 | 193193 | 163165 | 163163 | 156176 |
| Korea | MP | M15 | Hap11 | 104106 | 154160 | 215217 | 193193 | 163171 | 163163 | 156156 |
| Korea | MP | M16 | Hap11 | 106106 | 154160 | 217217 | 193193 | 163171 | 163163 | 156176 |
| Korea | MP | M17 | Hap11 | 106106 | 154160 | 217217 | 193193 | 169171 | 163163 | 156176 |
| Korea | MP | M18 | Hap11 | 106106 | 154160 | 217217 | 193193 | 163163 | 163163 | 156156 |
| Korea | MP | M19 | Hap11 | 106106 | 154160 | 217217 | 193193 | 163171 | 163163 | 156176 |
| Korea | MP | M20 | Hap11 | 106106 | 154160 | 217217 | 193193 | 163169 | 163163 | 156176 |
| Korea | MP | M21 | Hap11 | 106106 | 154160 | 217217 | 193193 | 163163 | 163163 | 156176 |
| Korea | MP | M22 | Hap11 | 106106 | 154160 | 217217 | 193193 | 169171 | 163163 | 156176 |
| Korea | MP | M23 | Hap11 | 104106 | 154160 | 217217 | 193193 | 163169 | 163163 | 156156 |
| Korea | MP | M24 | Hap11 | 106106 | 154160 | 217217 | 193193 | 163171 | 163163 | 156156 |
| Korea | MP | M25 | Hap11 | 106106 | 154160 | 215217 | 193193 | 165171 | 163163 | 156156 |
| Korea | MP | M26 | Hap11 | 106106 | 154160 | 217217 | 193193 | 163165 | 163163 | 156176 |
| Korea | MP | M27 | Hap11 | 106106 | 154160 | 217217 | 193193 | 163163 | 163163 | 156176 |
| Korea | MP | M28 | Hap11 | 106106 | 154160 | 217217 | 193193 | 171171 | 160163 | 156156 |
| Korea | MP | M29 | Hap11 | 106106 | 154160 | 217217 | 193193 | 163163 | 163163 | 156176 |
| Korea | MP | M30 | Hap11 | 106106 | 154160 | 217217 | 193193 | 163169 | 163163 | 156156 |
| Korea | MP | M31 | Hap11 | 106106 | 154160 | 217217 | 193193 | 163171 | 163163 | 156156 |

**Table S4**. Locations, coordinates, and climate characteristics (Bio1, Bio2, Bio4, Bio8, Bio12) of the occurrence data of *Gekko japonicus*, which used in species distribution modeling based on three past timeframes of the present and three past timeframes (last interglacial maximum 130 thousand years ago before present [LIG 130 Kyr], at last glacial maximum 21 Kyr [LGM 21 Kyr], and at mid-Holocene 6 Kyr).

| Country | Region | | | City | Coordinate | | LIG | | | | | LGM | | | | | mid-Holocene | | | | | Present | | | | |
| --- | --- | --- | --- | --- | --- | --- | --- | --- | --- | --- | --- | --- | --- | --- | --- | --- | --- | --- | --- | --- | --- | --- | --- | --- | --- | --- |
| N | E | bio1 | bio2 | bio4 | bio8 | bio12 | bio1 | bio2 | bio4 | bio8 | bio12 | bio1 | bio2 | bio4 | bio8 | bio12 | bio1 | bio2 | bio4 | bio8 | bio12 |
| China | Anhui | | | Huangshan | 29.4325 | 118.1834 | 161 | 83 | 10870 | 225 | 1588 | 103 | 92 | 8633 | 152 | 1649 | 144 | 79 | 8873 | 182 | 1810 | 156 | 79 | 8202 | 195 | 1798 |
| China | Anhui | | | Huangshan | 29.7064 | 118.3513 | 147 | 84 | 11165 | 230 | 1455 | 116 | 94 | 9047 | 166 | 1461 | 149 | 79 | 9107 | 187 | 1681 | 160 | 79 | 8436 | 200 | 1678 |
| China | Anhui | | | Anqing | 30.3244 | 116.1694 | 88 | 84 | 11537 | 237 | 1129 | 123 | 92 | 9080 | 195 | 1109 | 158 | 81 | 9452 | 199 | 1399 | 168 | 81 | 8708 | 211 | 1401 |
| China | Anhui | | | Anqing | 30.6207 | 116.623 | 66 | 85 | 11544 | 235 | 1039 | 122 | 92 | 9053 | 172 | 1023 | 157 | 81 | 9374 | 196 | 1320 | 167 | 81 | 8585 | 208 | 1322 |
| China | Anhui | | | Wuhu | 31.2866 | 118.3747 | 72 | 85 | 12230 | 233 | 883 | 116 | 85 | 9887 | 227 | 891 | 152 | 77 | 10028 | 275 | 1144 | 164 | 79 | 9160 | 254 | 1182 |
| China | Anhui | | | Wuhu | 31.3108 | 117.8667 | 58 | 85 | 12105 | 232 | 848 | 116 | 86 | 9631 | 214 | 865 | 153 | 78 | 9832 | 273 | 1120 | 164 | 79 | 8980 | 252 | 1151 |
| China | Anhui | | | Luan | 31.4496 | 116.2982 | 75 | 101 | 11902 | 229 | 1006 | 112 | 103 | 9186 | 230 | 984 | 147 | 95 | 9492 | 265 | 1304 | 157 | 96 | 8668 | 267 | 1326 |
| China | Anhui | | | Luan | 31.4915 | 115.6396 | 61 | 95 | 11898 | 273 | 971 | 110 | 97 | 9124 | 227 | 970 | 143 | 90 | 9499 | 261 | 1284 | 153 | 90 | 8692 | 262 | 1300 |
| China | Anhui | | | Luan | 31.5518 | 115.7554 | 61 | 97 | 11982 | 277 | 938 | 112 | 98 | 9196 | 229 | 946 | 147 | 91 | 9540 | 265 | 1247 | 157 | 92 | 8718 | 266 | 1267 |
| China | Anhui | | | Hefei | 31.9186 | 117.4633 | 42 | 90 | 12379 | 155 | 590 | 114 | 87 | 9744 | 237 | 661 | 149 | 81 | 9949 | 272 | 882 | 160 | 83 | 9061 | 274 | 917 |
| China | Anhui | | | Chizhou | 32.2767 | 118.2761 | 44 | 92 | 12434 | 271 | 711 | 105 | 87 | 9928 | 229 | 745 | 137 | 82 | 9942 | 259 | 992 | 148 | 85 | 9048 | 261 | 1038 |
| China | Anhui | | | Chizhou | 32.3176 | 118.2985 | 41 | 95 | 12543 | 281 | 692 | 109 | 88 | 10011 | 234 | 736 | 145 | 84 | 10036 | 268 | 972 | 156 | 87 | 9159 | 271 | 1021 |
| China | Anhui | | | Bengbu | 32.883 | 117.3984 | 23 | 102 | 13120 | 288 | 471 | 112 | 92 | 10295 | 240 | 575 | 146 | 89 | 10385 | 274 | 777 | 156 | 93 | 9439 | 274 | 814 |
| China | Anhui | | | Chizhou | 32.9741 | 118.0657 | 25 | 99 | 12942 | 273 | 500 | 109 | 89 | 10303 | 237 | 591 | 143 | 86 | 10247 | 270 | 798 | 154 | 90 | 9304 | 270 | 838 |
| China | Anhui | | | Bengbu | 33.1655 | 117.8148 | 21 | 101 | 13102 | 307 | 464 | 110 | 91 | 10394 | 239 | 564 | 144 | 87 | 10309 | 271 | 774 | 154 | 91 | 9364 | 271 | 807 |
| China | Chongqing | | | Huzhou | 28.4521 | 109.0447 | 15 | 89 | 9692 | 229 | 890 | 125 | 97 | 7530 | 202 | 1114 | 154 | 84 | 8332 | 231 | 1346 | 163 | 83 | 7761 | 239 | 1279 |
| China | Chongqing | | | Huzhou | 29.1663 | 107.1691 | 6 | 77 | 9341 | 233 | 719 | 125 | 81 | 6612 | 203 | 1083 | 163 | 73 | 7751 | 233 | 1204 | 170 | 70 | 7282 | 240 | 1134 |
| China | Chongqing | | | Huzhou | 29.3149 | 107.7368 | 7 | 81 | 9463 | 234 | 750 | 135 | 86 | 6802 | 204 | 1093 | 163 | 76 | 7794 | 234 | 1247 | 171 | 74 | 7312 | 241 | 1186 |
| China | Chongqing | | | Huzhou | 29.3357 | 108.1151 | 7 | 84 | 9474 | 232 | 807 | 127 | 89 | 6853 | 198 | 1149 | 161 | 78 | 7797 | 255 | 1315 | 168 | 76 | 7283 | 239 | 1251 |
| China | Chongqing | | | Huzhou | 29.5367 | 108.7574 | 13 | 86 | 9737 | 223 | 921 | 113 | 89 | 7089 | 185 | 1246 | 150 | 79 | 7988 | 248 | 1452 | 159 | 79 | 7437 | 231 | 1389 |
| China | Chongqing | | | Huzhou | 29.8696 | 107.6409 | 9 | 79 | 9781 | 232 | 717 | 137 | 84 | 6804 | 209 | 1075 | 161 | 74 | 7874 | 232 | 1261 | 169 | 72 | 7356 | 239 | 1207 |
| China | Chongqing | | | Huzhou | 30.0119 | 108.1239 | 16 | 80 | 9841 | 219 | 860 | 119 | 85 | 6877 | 201 | 1221 | 147 | 75 | 7849 | 244 | 1426 | 155 | 74 | 7323 | 226 | 1367 |
| China | Chongqing | | | Huzhou | 30.4183 | 119.4078 | 117 | 82 | 11156 | 206 | 1204 | 79 | 89 | 9013 | 196 | 1262 | 128 | 76 | 9127 | 240 | 1457 | 140 | 77 | 8352 | 220 | 1458 |
| China | Chongqing | | | Huzhou | 31.0538 | 109.4948 | 8 | 84 | 10471 | 233 | 590 | 130 | 92 | 7398 | 205 | 985 | 157 | 75 | 8237 | 258 | 1188 | 165 | 76 | 7587 | 239 | 1133 |
| China | Chongqing | | | Huzhou | 31.1071 | 109.8391 | 15 | 89 | 10585 | 230 | 519 | 112 | 93 | 7394 | 206 | 953 | 153 | 80 | 8402 | 256 | 1098 | 161 | 80 | 7738 | 237 | 1042 |
| China | Fujian | | | Quanzhou | 25.045 | 118.3305 | 99 | 78 | 7296 | 276 | 1304 | 150 | 107 | 6962 | 190 | 1323 | 193 | 69 | 6235 | 264 | 1332 | 205 | 68 | 5788 | 226 | 1308 |
| China | Fujian | | | Longyan | 25.9442 | 117.3095 | 139 | 102 | 8589 | 288 | 1541 | 152 | 109 | 6916 | 195 | 1653 | 190 | 94 | 7047 | 223 | 1616 | 202 | 95 | 6537 | 236 | 1590 |
| China | Fujian | | | Fuzhou | 26.3307 | 118.7484 | 127 | 86 | 8329 | 282 | 1427 | 143 | 97 | 7179 | 182 | 1495 | 189 | 80 | 7040 | 214 | 1500 | 201 | 80 | 6488 | 228 | 1485 |
| China | Fujian | | | Nanping | 26.6608 | 118.1471 | 140 | 92 | 8622 | 278 | 1644 | 149 | 101 | 7181 | 190 | 1690 | 179 | 86 | 7103 | 209 | 1734 | 191 | 86 | 6556 | 224 | 1718 |
| China | Fujian | | | Nanping | 27.7547 | 118.0258 | 182 | 92 | 9725 | 248 | 1726 | 136 | 102 | 7821 | 180 | 1857 | 171 | 88 | 8020 | 204 | 1859 | 183 | 88 | 7412 | 218 | 1847 |
| China | Fujian | | | Nanping | 27.7863 | 117.8162 | 191 | 82 | 9380 | 227 | 1948 | 110 | 89 | 7428 | 152 | 2088 | 152 | 78 | 7698 | 184 | 2103 | 164 | 78 | 7083 | 197 | 2071 |
| China | Guanxi | | | Laibin | 23.7472 | 109.2724 | 94 | 80 | 7793 | 297 | 1229 | 182 | 93 | 6052 | 244 | 1319 | 205 | 80 | 6548 | 264 | 1539 | 216 | 77 | 6141 | 276 | 1398 |
| China | Guanxi | | | Hechi | 24.7329 | 108.1082 | 35 | 77 | 7640 | 275 | 1294 | 174 | 93 | 6017 | 236 | 1293 | 203 | 79 | 6661 | 277 | 1640 | 212 | 78 | 6244 | 285 | 1470 |
| China | Guanxi | | | Guilin | 25.7981 | 110.4564 | 108 | 87 | 9285 | 255 | 1310 | 132 | 94 | 7259 | 173 | 1456 | 169 | 81 | 8003 | 242 | 1644 | 180 | 80 | 7437 | 218 | 1583 |
| China | Guizhou | | | Longli | 26.4463 | 106.9485 | 5 | 81 | 7916 | 239 | 1004 | 121 | 89 | 6202 | 185 | 1062 | 150 | 80 | 7105 | 215 | 1332 | 160 | 79 | 6590 | 225 | 1207 |
| China | Guizhou | | | Guiding | 26.5692 | 107.2113 | 8 | 81 | 8046 | 231 | 1013 | 120 | 89 | 6352 | 186 | 1052 | 140 | 78 | 7245 | 224 | 1356 | 149 | 78 | 6739 | 216 | 1236 |
| China | Guizhou | | | Guiyang | 26.6472 | 106.5837 | 4 | 80 | 7977 | 236 | 996 | 122 | 88 | 6201 | 187 | 1056 | 147 | 79 | 7163 | 231 | 1336 | 156 | 78 | 6671 | 223 | 1197 |
| China | Guizhou | | | Tongren | 27.7213 | 108.8483 | 11 | 87 | 9450 | 240 | 831 | 127 | 94 | 7461 | 204 | 1036 | 162 | 82 | 8307 | 263 | 1239 | 171 | 81 | 7733 | 247 | 1167 |
| China | Guizhou | | | Tongren | 27.8476 | 108.7701 | 10 | 86 | 9441 | 234 | 840 | 121 | 92 | 7423 | 197 | 1062 | 157 | 81 | 8277 | 257 | 1256 | 166 | 79 | 7715 | 242 | 1181 |
| China | Guizhou | | | Zunyi | 28.4535 | 105.9747 | 7 | 75 | 8629 | 255 | 755 | 129 | 78 | 6209 | 207 | 999 | 163 | 74 | 7499 | 253 | 1181 | 172 | 70 | 7002 | 258 | 1074 |
| China | Guizhou | | | Zunyi | 28.8423 | 107.5972 | 7 | 79 | 9252 | 222 | 799 | 111 | 83 | 6723 | 180 | 1138 | 150 | 74 | 7779 | 221 | 1267 | 157 | 72 | 7305 | 228 | 1192 |
| China | Henan | | | Xinyang | 31.7947 | 114.0772 | 52 | 89 | 11997 | 216 | 811 | 104 | 89 | 9007 | 217 | 885 | 134 | 84 | 9472 | 251 | 1176 | 142 | 85 | 8712 | 251 | 1181 |
| China | Henan | Pingdingshan | | | 33.5019 | 113.0951 | 9 | 119 | 13219 | 234 | 334 | 107 | 108 | 9659 | 227 | 551 | 139 | 104 | 10079 | 256 | 779 | 147 | 108 | 9259 | 264 | 763 |
| China | Hubei | | | Enshi | 29.8101 | 108.7537 | 20 | 81 | 9733 | 202 | 984 | 97 | 85 | 6966 | 186 | 1303 | 130 | 74 | 7856 | 225 | 1541 | 138 | 74 | 7322 | 209 | 1474 |
| China | Hubei | | | Huangshi | 29.8333 | 115.4333 | 93 | 86 | 11348 | 241 | 1161 | 125 | 94 | 8945 | 216 | 1160 | 161 | 84 | 9367 | 201 | 1420 | 172 | 83 | 8629 | 213 | 1412 |
| China | Hubei | | | Jingzhou | 29.9459 | 113.4922 | 78 | 80 | 11316 | 241 | 945 | 128 | 84 | 8896 | 219 | 993 | 160 | 76 | 9440 | 203 | 1260 | 169 | 76 | 8681 | 214 | 1259 |
| China | Hubei | | | Enshi | 30.0116 | 109.1256 | 27 | 79 | 9765 | 189 | 1018 | 91 | 86 | 7043 | 178 | 1323 | 117 | 72 | 7831 | 213 | 1595 | 125 | 72 | 7278 | 196 | 1515 |
| China | Hubei | | | Yichang | 30.3779 | 110.7769 | 35 | 89 | 10478 | 229 | 729 | 107 | 92 | 7772 | 206 | 1023 | 152 | 81 | 8506 | 256 | 1259 | 160 | 81 | 7896 | 259 | 1190 |
| China | Hubei | | | Enshi | 30.563 | 108.6863 | 14 | 81 | 10127 | 211 | 866 | 102 | 86 | 6936 | 179 | 1274 | 138 | 75 | 7977 | 236 | 1476 | 146 | 74 | 7383 | 234 | 1410 |
| China | Hubei | | | Xiaogan | 30.8299 | 114.1343 | 56 | 86 | 11819 | 240 | 857 | 127 | 88 | 9119 | 220 | 920 | 159 | 82 | 9646 | 250 | 1176 | 169 | 82 | 8870 | 257 | 1188 |
| China | Hubei | | | Jingmen | 31.2174 | 112.64 | 31 | 91 | 11600 | 238 | 511 | 128 | 91 | 8788 | 239 | 686 | 156 | 86 | 9320 | 271 | 936 | 164 | 84 | 8627 | 272 | 919 |
| China | Hubei | | | Yichang | 31.2234 | 110.5448 | 23 | 96 | 10712 | 213 | 510 | 84 | 96 | 7531 | 180 | 924 | 134 | 86 | 8519 | 239 | 1062 | 143 | 86 | 7867 | 242 | 1009 |
| China | Hubei | | | Yichang | 31.37 | 110.237 | 19 | 92 | 10610 | 199 | 560 | 82 | 95 | 7370 | 173 | 950 | 121 | 82 | 8327 | 223 | 1138 | 130 | 82 | 7656 | 220 | 1080 |
| China | Hubei | | | Yichang | 31.4035 | 110.4782 | 20 | 96 | 10718 | 205 | 520 | 77 | 96 | 7450 | 172 | 932 | 126 | 86 | 8452 | 231 | 1081 | 134 | 86 | 7807 | 233 | 1027 |
| China | Hubei | | | Yichang | 31.4044 | 110.5564 | 20 | 98 | 10823 | 212 | 491 | 73 | 95 | 7459 | 169 | 936 | 132 | 88 | 8524 | 237 | 1041 | 140 | 88 | 7884 | 240 | 989 |
| China | Hubei | | | Yichang | 31.5423 | 110.2518 | 17 | 93 | 10668 | 194 | 552 | 46 | 89 | 7128 | 123 | 1074 | 115 | 83 | 8346 | 216 | 1134 | 123 | 83 | 7685 | 213 | 1080 |
| China | Hubei | | | Xiangyang | 31.7268 | 111.2163 | 23 | 101 | 11094 | 198 | 549 | 79 | 102 | 7892 | 179 | 814 | 117 | 91 | 8735 | 222 | 1081 | 125 | 90 | 8056 | 218 | 1037 |
| China | Hubei | | | Shiyan | 31.9386 | 110.7401 | 12 | 107 | 11182 | 207 | 455 | 79 | 106 | 7752 | 178 | 808 | 124 | 97 | 8769 | 229 | 997 | 132 | 97 | 8088 | 226 | 951 |
| China | Hubei | | | Xiangyang | 31.9526 | 112.952 | 21 | 99 | 12043 | 235 | 504 | 122 | 95 | 9002 | 235 | 676 | 150 | 92 | 9505 | 269 | 922 | 158 | 92 | 8776 | 268 | 914 |
| China | Hubei | | | Xiangyang | 31.9741 | 111.4137 | 23 | 105 | 11478 | 210 | 487 | 88 | 105 | 8164 | 191 | 757 | 126 | 95 | 9011 | 233 | 1012 | 133 | 95 | 8315 | 228 | 973 |
| China | Hubei | | | Shiyan | 32.6662 | 111.1414 | 20 | 119 | 12155 | 166 | 345 | 116 | 120 | 8597 | 204 | 663 | 149 | 109 | 9428 | 259 | 884 | 156 | 108 | 8738 | 254 | 846 |
| China | Hunan | | | Yongzhou | 26.0633 | 111.8968 | 137 | 80 | 9652 | 225 | 1310 | 105 | 85 | 7481 | 148 | 1510 | 138 | 73 | 8106 | 176 | 1602 | 149 | 72 | 7560 | 188 | 1549 |
| China | Hunan | | | Yongzhou | 26.3498 | 111.372 | 118 | 82 | 10005 | 258 | 1110 | 143 | 89 | 8011 | 188 | 1284 | 173 | 76 | 8634 | 211 | 1400 | 183 | 74 | 8060 | 223 | 1378 |
| China | Hunan | | | Huaihua | 26.5041 | 109.52 | 59 | 89 | 9158 | 241 | 1020 | 128 | 97 | 7271 | 171 | 1144 | 159 | 83 | 8035 | 197 | 1346 | 169 | 84 | 7457 | 209 | 1313 |
| China | Hunan | | | Hengyang | 27.2718 | 112.7107 | 133 | 79 | 10435 | 177 | 1521 | 118 | 85 | 8258 | 137 | 1601 | 152 | 74 | 8929 | 192 | 1794 | 162 | 73 | 8297 | 205 | 1754 |
| China | Hunan | | | Huaihua | 27.2881 | 110.4076 | 88 | 82 | 9549 | 211 | 1123 | 98 | 89 | 7518 | 140 | 1283 | 134 | 77 | 8275 | 170 | 1468 | 143 | 76 | 7689 | 182 | 1446 |
| China | Hunan | | | Huaihua | 27.3474 | 109.1725 | 18 | 88 | 9427 | 240 | 854 | 131 | 96 | 7513 | 207 | 1032 | 161 | 83 | 8300 | 237 | 1238 | 170 | 82 | 7744 | 212 | 1183 |
| China | Hunan | | | Huayuan | 28.576 | 109.4974 | 26 | 90 | 9837 | 234 | 940 | 126 | 98 | 7707 | 204 | 1160 | 158 | 85 | 8427 | 236 | 1403 | 167 | 84 | 7867 | 244 | 1338 |
| China | Hunan | | | Yueyang | 29.4382 | 113.1453 | 93 | 71 | 11151 | 241 | 1002 | 130 | 76 | 8841 | 180 | 1040 | 160 | 68 | 9364 | 202 | 1314 | 170 | 67 | 8659 | 214 | 1303 |
| China | Jiangsu | | | Wuxi | 31.3137 | 119.7945 | 88 | 85 | 11533 | 269 | 833 | 105 | 85 | 9626 | 229 | 878 | 144 | 78 | 9480 | 261 | 1084 | 157 | 80 | 8615 | 265 | 1121 |
| China | Jiangsu | | | Suzhou | 31.3961 | 120.5412 | 75 | 80 | 11192 | 213 | 689 | 103 | 78 | 9563 | 226 | 747 | 142 | 74 | 9312 | 256 | 940 | 155 | 75 | 8409 | 260 | 975 |
| China | Jiangsu | | | Nanjing | 32.0515 | 118.7515 | 51 | 96 | 12237 | 226 | 690 | 109 | 90 | 9867 | 233 | 733 | 145 | 86 | 9853 | 266 | 962 | 156 | 88 | 8970 | 268 | 1007 |
| China | Jiangsu | | | Nantong | 32.411 | 120.609 | 44 | 82 | 11656 | 208 | 709 | 95 | 104 | 10701 | 229 | 812 | 136 | 75 | 9513 | 252 | 955 | 148 | 76 | 8668 | 256 | 1013 |
| China | Jiangsu | | | Yangzhou | 32.4121 | 119.4057 | 40 | 88 | 12499 | 278 | 695 | 106 | 77 | 10309 | 236 | 737 | 142 | 78 | 10220 | 268 | 966 | 154 | 80 | 9260 | 270 | 1010 |
| China | Jiangsu | | | Nantong | 32.5381 | 120.4009 | 44 | 87 | 11895 | 262 | 688 | 96 | 98 | 10576 | 228 | 778 | 135 | 80 | 9702 | 254 | 940 | 147 | 81 | 8813 | 257 | 995 |
| China | Jiangsu | | | Yangzhou | 32.8942 | 119.7408 | 35 | 93 | 12401 | 270 | 640 | 100 | 79 | 10339 | 230 | 691 | 137 | 82 | 10118 | 262 | 912 | 148 | 85 | 9128 | 263 | 957 |
| China | Jiangsu | | | Huaian | 33.0941 | 118.6044 | 25 | 98 | 12798 | 270 | 502 | 105 | 87 | 10385 | 234 | 591 | 141 | 83 | 10175 | 266 | 792 | 151 | 88 | 9202 | 266 | 835 |
| China | Jiangsu | | | Yancheng | 33.281 | 120.0265 | 30 | 95 | 12300 | 290 | 653 | 95 | 88 | 10528 | 227 | 711 | 134 | 81 | 9948 | 257 | 910 | 145 | 86 | 9025 | 259 | 965 |
| China | Jiangsu | | | Yancheng | 33.2813 | 120.0293 | 30 | 95 | 12300 | 290 | 653 | 95 | 88 | 10528 | 227 | 711 | 134 | 81 | 9948 | 257 | 910 | 145 | 86 | 9025 | 259 | 965 |
| China | Jiangsu | | | Yancheng | 33.3094 | 120.2081 | 31 | 94 | 12211 | 288 | 669 | 93 | 97 | 10705 | 228 | 744 | 134 | 82 | 9863 | 255 | 921 | 145 | 86 | 8977 | 258 | 978 |
| China | Jiangsu | | | Yancheng | 33.9942 | 119.8726 | 23 | 94 | 12558 | 290 | 491 | 90 | 116 | 11429 | 232 | 614 | 131 | 79 | 9960 | 253 | 748 | 141 | 83 | 9116 | 255 | 804 |
| China | Jiangsu | | Lianyungang | | 34.7193 | 119.4054 | 9 | 95 | 12993 | 277 | 577 | 78 | 118 | 11724 | 222 | 656 | 111 | 75 | 10093 | 235 | 845 | 121 | 81 | 9270 | 232 | 892 |
| China | Jiangxi | | | Ganzhou | 24.5413 | 114.4601 | 135 | 93 | 8157 | 268 | 1823 | 136 | 97 | 6342 | 176 | 1910 | 168 | 85 | 6565 | 200 | 1998 | 180 | 84 | 6092 | 213 | 1866 |
| China | Jiangxi | | | Ganzhou | 24.8992 | 114.7833 | 126 | 96 | 8723 | 296 | 1602 | 162 | 102 | 6984 | 205 | 1697 | 191 | 88 | 7147 | 224 | 1751 | 202 | 87 | 6658 | 238 | 1653 |
| China | Jiangxi | | | Ganzhou | 25.7543 | 114.9219 | 105 | 91 | 9583 | 301 | 1432 | 157 | 98 | 7703 | 202 | 1582 | 185 | 86 | 8073 | 222 | 1576 | 196 | 83 | 7522 | 235 | 1516 |
| China | Jiangxi | | | Ganzhou | 25.8202 | 114.058 | 128 | 88 | 9544 | 245 | 1494 | 119 | 93 | 7372 | 164 | 1705 | 158 | 81 | 7889 | 195 | 1690 | 169 | 80 | 7327 | 208 | 1614 |
| China | Jiangxi | | | Ganzhou | 26.0234 | 116.3136 | 148 | 102 | 8926 | 278 | 1652 | 143 | 109 | 7101 | 187 | 1791 | 174 | 96 | 7351 | 209 | 1758 | 186 | 95 | 6794 | 222 | 1715 |
| China | Jiangxi | | | Jian | 26.5908 | 114.1694 | 151 | 81 | 9687 | 219 | 1596 | 104 | 88 | 7565 | 150 | 1709 | 133 | 76 | 8022 | 170 | 1802 | 144 | 75 | 7431 | 183 | 1734 |
| China | Jiangxi | | | Jian | 27.4333 | 114.2742 | 151 | 86 | 10353 | 247 | 1424 | 133 | 93 | 8293 | 181 | 1490 | 162 | 83 | 8705 | 201 | 1629 | 173 | 82 | 8071 | 215 | 1584 |
| China | Jiangxi | | | Fuzhou | 27.8365 | 117.1986 | 177 | 86 | 9933 | 244 | 1734 | 129 | 94 | 7880 | 172 | 1891 | 165 | 83 | 8215 | 200 | 1894 | 177 | 82 | 7597 | 213 | 1862 |
| China | Jiangxi | | | Yingtan | 28.2563 | 117.0993 | 169 | 88 | 10450 | 255 | 1601 | 142 | 98 | 8414 | 188 | 1687 | 174 | 85 | 8687 | 211 | 1780 | 186 | 84 | 8041 | 224 | 1752 |
| China | Jiangxi | | | Nanchang | 28.3148 | 116.2728 | 102 | 81 | 10657 | 252 | 1214 | 139 | 90 | 8614 | 186 | 1305 | 170 | 79 | 8923 | 209 | 1410 | 182 | 77 | 8249 | 222 | 1374 |
| China | Jiangxi | | | Yichun | 28.5021 | 114.5594 | 128 | 93 | 10650 | 240 | 1316 | 123 | 102 | 8442 | 170 | 1357 | 158 | 91 | 8873 | 197 | 1546 | 169 | 90 | 8216 | 210 | 1510 |
| China | Jiangxi | | | Nanchang | 28.9607 | 116.3544 | 84 | 82 | 10919 | 290 | 1159 | 135 | 92 | 8785 | 199 | 1199 | 167 | 80 | 9107 | 277 | 1386 | 179 | 79 | 8421 | 217 | 1352 |
| China | Jiangxi | | | Jiujiang | 28.9773 | 114.9471 | 122 | 83 | 10435 | 205 | 1422 | 93 | 92 | 8187 | 139 | 1411 | 126 | 81 | 8555 | 163 | 1674 | 137 | 80 | 7893 | 176 | 1633 |
| China | Jiangxi | | | Jingdezhen | 29.2208 | 117.1483 | 158 | 94 | 10917 | 247 | 1520 | 130 | 104 | 8661 | 178 | 1543 | 167 | 92 | 8956 | 205 | 1738 | 178 | 91 | 8272 | 218 | 1723 |
| China | Jiangxi | | | Jiujiang | 29.5963 | 116.0373 | 113 | 79 | 11197 | 279 | 1493 | 110 | 87 | 8724 | 221 | 1434 | 153 | 76 | 9297 | 266 | 1763 | 164 | 76 | 8571 | 271 | 1726 |
| China | Jiangxi | | | Jiujiang | 29.6336 | 115.998 | 113 | 79 | 11125 | 274 | 1461 | 117 | 88 | 8850 | 231 | 1370 | 150 | 76 | 9200 | 261 | 1728 | 161 | 76 | 8470 | 266 | 1695 |
| China | Jiangxi | | | Jiujiang | 29.6867 | 116.0247 | 114 | 80 | 11337 | 240 | 1278 | 126 | 89 | 9018 | 188 | 1258 | 161 | 77 | 9441 | 200 | 1527 | 172 | 77 | 8699 | 212 | 1516 |
| China | Jiangxi | | | Jiujiang | 29.8219 | 116.6598 | 110 | 83 | 11335 | 242 | 1260 | 123 | 92 | 8991 | 173 | 1269 | 161 | 80 | 9351 | 201 | 1507 | 173 | 80 | 8617 | 214 | 1500 |
| China | Shaanxi | | | Hanzhong | 33.325 | 106.9742 | 0 | 81 | 11511 | 136 | 284 | 77 | 95 | 7315 | 150 | 777 | 116 | 85 | 8746 | 219 | 841 | 123 | 83 | 8006 | 213 | 856 |
| China | Shaanxi | | | Shangluo | 33.3613 | 110.9582 | 7 | 120 | 12388 | 215 | 276 | 88 | 124 | 8469 | 175 | 649 | 124 | 110 | 9410 | 234 | 829 | 131 | 109 | 8688 | 229 | 792 |
| China | Shaanxi | | | Shangluo | 33.367 | 110.0567 | 4 | 111 | 12272 | 216 | 245 | 83 | 114 | 8195 | 167 | 681 | 125 | 105 | 9381 | 236 | 795 | 133 | 102 | 8620 | 230 | 766 |
| China | Shaanxi | | | Ankang | 33.4777 | 108.4891 | 6 | 77 | 11314 | 77 | 374 | 21 | 87 | 7181 | 95 | 902 | 59 | 74 | 8447 | 161 | 992 | 66 | 74 | 7687 | 154 | 994 |
| China | Shaanxi | | | Hanzhong | 33.5913 | 107.7706 | 0 | 84 | 11766 | 120 | 284 | 57 | 95 | 7499 | 134 | 779 | 99 | 84 | 8924 | 205 | 839 | 106 | 84 | 8163 | 198 | 857 |
| China | Shaanxi | | | Ankang | 33.6279 | 108.1594 | 1 | 85 | 11835 | 111 | 283 | 54 | 95 | 7638 | 131 | 777 | 91 | 83 | 8968 | 198 | 857 | 98 | 83 | 8168 | 190 | 870 |
| China | Shanghai | | | Shanghai | 31.1995 | 121.4381 | 74 | 77 | 10903 | 217 | 807 | 106 | 89 | 10041 | 235 | 895 | 149 | 72 | 9185 | 260 | 1029 | 162 | 73 | 8370 | 266 | 1080 |
| China | Shanghai | | | Shanghai | 31.2242 | 121.4416 | 72 | 77 | 10893 | 216 | 800 | 106 | 89 | 10043 | 235 | 892 | 149 | 72 | 9168 | 260 | 1024 | 162 | 73 | 8357 | 266 | 1075 |
| China | Shanghai | | | Shanghai | 31.2338 | 121.4688 | 71 | 76 | 10871 | 215 | 795 | 106 | 89 | 10010 | 234 | 885 | 149 | 72 | 9149 | 259 | 1017 | 161 | 73 | 8336 | 265 | 1068 |
| China | Zhejiang | | | Wenzhou | 27.752 | 120.5989 | 129 | 73 | 8980 | 264 | 1501 | 129 | 115 | 8899 | 245 | 1678 | 173 | 68 | 7762 | 265 | 1662 | 186 | 67 | 7220 | 274 | 1622 |
| China | Zhejiang | | | Wenzhou | 27.7651 | 120.5995 | 128 | 73 | 9010 | 265 | 1509 | 129 | 114 | 8878 | 245 | 1679 | 174 | 69 | 7813 | 266 | 1670 | 186 | 68 | 7238 | 274 | 1630 |
| China | Zhejiang | | | Wenzhou | 27.7687 | 120.6035 | 128 | 73 | 8990 | 264 | 1508 | 129 | 115 | 8899 | 246 | 1678 | 173 | 68 | 7779 | 265 | 1669 | 186 | 67 | 7220 | 274 | 1629 |
| China | Zhejiang | | | Lishui | 28.4174 | 119.9342 | 122 | 91 | 10035 | 282 | 1322 | 132 | 103 | 8679 | 180 | 1379 | 169 | 87 | 8431 | 203 | 1489 | 181 | 86 | 7792 | 217 | 1474 |
| China | Zhejiang | | | Lishui | 28.5924 | 119.2688 | 144 | 89 | 10334 | 279 | 1410 | 122 | 99 | 8565 | 186 | 1488 | 163 | 86 | 8629 | 199 | 1577 | 175 | 85 | 7968 | 213 | 1571 |
| China | Zhejiang | | | Quzhou | 28.9697 | 118.39 | 173 | 86 | 10724 | 237 | 1565 | 123 | 98 | 8717 | 170 | 1618 | 158 | 83 | 8871 | 194 | 1755 | 170 | 82 | 8202 | 208 | 1746 |
| China | Zhejiang | | | Jinhua | 29.0179 | 120.1958 | 125 | 88 | 10408 | 237 | 1267 | 123 | 100 | 9037 | 172 | 1326 | 161 | 84 | 8755 | 196 | 1464 | 174 | 83 | 8103 | 210 | 1449 |
| China | Zhejiang | | | Ningbo | 29.7985 | 121.7984 | 130 | 69 | 9919 | 144 | 1195 | 99 | 113 | 9970 | 230 | 1412 | 149 | 66 | 8515 | 252 | 1367 | 162 | 65 | 7873 | 261 | 1407 |
| China | Zhejiang | | | Zhoushan | 29.9286 | 122.3506 | 136 | 62 | 9369 | 144 | 1040 | 108 | 140 | 10555 | 215 | 1369 | 156 | 58 | 8086 | 174 | 1198 | 169 | 58 | 7539 | 188 | 1249 |
| China | Zhejiang | | | Zhoushan | 30.0223 | 122.1018 | 129 | 67 | 9641 | 145 | 1070 | 107 | 132 | 10324 | 241 | 1364 | 155 | 63 | 8282 | 254 | 1238 | 168 | 63 | 7693 | 266 | 1290 |
| China | Zhejiang | | | Zhoushan | 30.0404 | 121.8777 | 126 | 70 | 9954 | 142 | 1110 | 106 | 118 | 10113 | 237 | 1311 | 149 | 66 | 8508 | 251 | 1284 | 162 | 66 | 7900 | 259 | 1332 |
| China | Zhejiang | | | Hangzhou | 30.2102 | 120.1515 | 129 | 84 | 11089 | 232 | 1140 | 118 | 92 | 9449 | 214 | 1161 | 156 | 79 | 9246 | 269 | 1371 | 168 | 80 | 8500 | 249 | 1383 |
| China | Zhejiang | | | Hangzhou | 30.321 | 119.9772 | 128 | 85 | 11204 | 232 | 1116 | 118 | 93 | 9462 | 241 | 1146 | 155 | 79 | 9305 | 269 | 1357 | 167 | 80 | 8562 | 249 | 1366 |
| China | Zhejiang | | | Zhoushan | 30.4404 | 122.3074 | 110 | 62 | 9570 | 136 | 863 | 102 | 135 | 10473 | 208 | 1134 | 149 | 59 | 8160 | 166 | 1033 | 162 | 59 | 7602 | 180 | 1095 |
| Japan | Chubu | | | Aichi | 34.7612 | 137.3704 | 209 | 83 | 9061 | 188 | 1675 | 96 | 95 | 9665 | 215 | 1728 | 149 | 77 | 8076 | 245 | 1707 | 159 | 78 | 7651 | 252 | 1793 |
| Japan | Chubu | | | Aichi | 34.7631 | 137.3841 | 209 | 83 | 9079 | 188 | 1681 | 96 | 95 | 9666 | 215 | 1727 | 148 | 78 | 8107 | 244 | 1712 | 159 | 78 | 7659 | 252 | 1799 |
| Japan | Chubu | | | Aichi | 34.7706 | 137.368 | 207 | 83 | 9120 | 188 | 1659 | 96 | 95 | 9701 | 216 | 1702 | 149 | 78 | 8138 | 245 | 1692 | 159 | 78 | 7700 | 253 | 1777 |
| Japan | Chubu | | | Aichi | 34.9463 | 137.1582 | 181 | 88 | 9521 | 188 | 1461 | 93 | 99 | 10100 | 216 | 1492 | 146 | 83 | 8556 | 249 | 1504 | 156 | 84 | 8057 | 260 | 1581 |
| Japan | Chubu | | | Aichi | 35.0463 | 136.9928 | 172 | 90 | 9556 | 190 | 1461 | 94 | 101 | 10118 | 217 | 1485 | 147 | 85 | 8584 | 251 | 1503 | 157 | 86 | 8073 | 261 | 1583 |
| Japan | Chubu | | | Aichi | 35.0719 | 136.982 | 171 | 91 | 9573 | 190 | 1464 | 94 | 102 | 10141 | 217 | 1486 | 146 | 85 | 8619 | 251 | 1506 | 157 | 86 | 8113 | 261 | 1586 |
| Japan | Chubu | | | Aichi | 35.1052 | 137.0188 | 171 | 92 | 9612 | 190 | 1470 | 93 | 102 | 10153 | 217 | 1479 | 146 | 86 | 8618 | 250 | 1511 | 156 | 87 | 8133 | 261 | 1592 |
| Japan | Chubu | | | Aichi | 35.1536 | 136.9679 | 170 | 92 | 9617 | 192 | 1468 | 94 | 103 | 10154 | 217 | 1480 | 146 | 87 | 8625 | 251 | 1511 | 157 | 88 | 8132 | 226 | 1591 |
| Japan | Chubu | | | Aichi | 35.1776 | 137.0054 | 172 | 93 | 9679 | 191 | 1481 | 94 | 102 | 10178 | 217 | 1486 | 147 | 87 | 8698 | 252 | 1521 | 157 | 88 | 8197 | 226 | 1604 |
| Japan | Chubu | | | Aichi | 35.1784 | 136.8551 | 185 | 93 | 9559 | 191 | 1538 | 94 | 103 | 10123 | 217 | 1537 | 148 | 87 | 8591 | 252 | 1579 | 157 | 88 | 8063 | 225 | 1662 |
| Japan | Chubu | | | Aichi | 35.2137 | 137.1091 | 188 | 95 | 9724 | 184 | 1655 | 88 | 103 | 10215 | 211 | 1613 | 139 | 89 | 8746 | 252 | 1686 | 148 | 90 | 8234 | 254 | 1778 |
| Japan | Chubu | | | Gifu | 35.3212 | 136.545 | 282 | 89 | 9626 | 185 | 1731 | 80 | 101 | 10271 | 207 | 1691 | 141 | 84 | 8676 | 247 | 1769 | 151 | 85 | 8141 | 220 | 1857 |
| Japan | Chubu | | | Gifu | 35.387 | 136.9157 | 221 | 96 | 9735 | 191 | 1771 | 91 | 105 | 10252 | 215 | 1720 | 145 | 90 | 8761 | 252 | 1798 | 155 | 91 | 8208 | 225 | 1896 |
| Japan | Chubu | | | Gifu | 35.4027 | 136.7951 | 234 | 95 | 9698 | 243 | 1817 | 92 | 105 | 10232 | 219 | 1755 | 146 | 89 | 8703 | 216 | 1845 | 156 | 90 | 8176 | 225 | 1944 |
| Japan | Chubu | | | Gifu | 35.4041 | 136.8056 | 237 | 95 | 9699 | 244 | 1824 | 91 | 105 | 10236 | 218 | 1764 | 146 | 90 | 8712 | 216 | 1852 | 156 | 90 | 8178 | 225 | 1951 |
| Japan | Chubu | | | Gifu | 35.4383 | 136.7548 | 261 | 94 | 9726 | 243 | 1870 | 89 | 104 | 10248 | 217 | 1786 | 145 | 89 | 8743 | 251 | 1895 | 154 | 90 | 8209 | 224 | 1997 |
| Japan | Chubu | | | Fukui | 35.9872 | 136.4926 | 691 | 86 | 10238 | 25 | 2251 | 58 | 93 | 10430 | 183 | 1924 | 122 | 80 | 9185 | 8 | 2293 | 131 | 81 | 8715 | 20 | 2392 |
| Japan | Chubu | | | Fukui | 36.0545 | 136.2167 | 834 | 83 | 9765 | 16 | 2307 | 70 | 90 | 9827 | 189 | 1868 | 134 | 78 | 8740 | 26 | 2364 | 143 | 78 | 8276 | 39 | 2453 |
| Japan | Chubu | | | Ishikawa | 36.2849 | 136.654 | 591 | 87 | 10227 | 7 | 2212 | 34 | 96 | 10453 | 160 | 1924 | 105 | 81 | 9150 | 223 | 2255 | 113 | 82 | 8681 | 224 | 2361 |
| Japan | Chubu | | | Ishikawa | 36.4304 | 136.6413 | 727 | 85 | 9891 | 31 | 2341 | 48 | 97 | 10239 | 172 | 1946 | 125 | 80 | 8845 | 45 | 2395 | 133 | 80 | 8383 | 55 | 2493 |
| Japan | Chubu | | | Ishikawa | 36.5381 | 136.6822 | 767 | 84 | 9678 | 43 | 2376 | 65 | 99 | 10071 | 188 | 1974 | 133 | 78 | 8653 | 56 | 2438 | 142 | 79 | 8195 | 66 | 2533 |
| Japan | Chubu | | | Ishikawa | 36.5554 | 136.6812 | 771 | 84 | 9676 | 43 | 2379 | 66 | 99 | 10031 | 189 | 1975 | 134 | 78 | 8645 | 57 | 2444 | 142 | 79 | 8177 | 67 | 2538 |
| Japan | Chubu | | | Toyama | 36.7122 | 137.0699 | 753 | 83 | 9688 | 41 | 2225 | 64 | 117 | 10673 | 191 | 1851 | 131 | 78 | 8637 | 55 | 2297 | 140 | 78 | 8168 | 65 | 2382 |
| Japan | Chubu | | | Toyama | 36.7129 | 137.1076 | 751 | 83 | 9696 | 40 | 2221 | 63 | 119 | 10779 | 192 | 1848 | 131 | 78 | 8659 | 54 | 2295 | 140 | 79 | 8172 | 64 | 2379 |
| Japan | Chubu | | | Toyama | 36.714 | 137.0931 | 752 | 83 | 9693 | 41 | 2224 | 63 | 118 | 10726 | 191 | 1850 | 131 | 78 | 8656 | 55 | 2297 | 140 | 78 | 8176 | 65 | 2381 |
| Japan | Chubu | | | Toyama | 36.7201 | 137.107 | 751 | 83 | 9696 | 40 | 2221 | 63 | 119 | 10779 | 192 | 1848 | 131 | 78 | 8659 | 54 | 2295 | 140 | 79 | 8172 | 64 | 2379 |
| Japan | Chubu | | | Toyama | 36.744 | 137.0326 | 763 | 82 | 9684 | 40 | 2232 | 64 | 115 | 10642 | 191 | 1853 | 131 | 77 | 8631 | 55 | 2305 | 139 | 77 | 8185 | 64 | 2390 |
| Japan | Chubu | | | Toyama | 36.7527 | 137.0929 | 763 | 82 | 9674 | 40 | 2226 | 64 | 118 | 10723 | 191 | 1845 | 131 | 77 | 8623 | 55 | 2299 | 139 | 78 | 8145 | 64 | 2383 |
| Japan | Chubu | | | Toyama | 36.9484 | 137.558 | 723 | 89 | 9718 | 37 | 2069 | 57 | 146 | 11534 | 191 | 1705 | 128 | 84 | 8659 | 52 | 2156 | 137 | 84 | 8188 | 62 | 2227 |
| Japan | Chubu | | | Ishikawa | 37.1366 | 136.8684 | 559 | 80 | 9409 | 37 | 2199 | 56 | 113 | 10194 | 179 | 1820 | 124 | 75 | 8405 | 51 | 2287 | 132 | 76 | 7934 | 61 | 2374 |
| Japan | Chubu | | | Nigata | 37.8633 | 138.9564 | 444 | 77 | 10043 | 32 | 1774 | 59 | 96 | 10388 | 185 | 1423 | 125 | 72 | 9006 | 46 | 1873 | 133 | 73 | 8462 | 56 | 1923 |
| Japan | Chubu | | | Shizuoka | 34.6975 | 138.9389 | 322 | 62 | 7758 | 183 | 1971 | 96 | 85 | 8536 | 171 | 2014 | 154 | 57 | 6744 | 232 | 2000 | 165 | 57 | 6388 | 213 | 2083 |
| Japan | Chugoku | | | Yamaguchi | 34.1641 | 131.5049 | 227 | 96 | 9233 | 227 | 1667 | 84 | 100 | 9375 | 174 | 1562 | 140 | 92 | 8320 | 207 | 1703 | 150 | 93 | 7867 | 217 | 1833 |
| Japan | Chugoku | | | Yamaguchi | 34.1648 | 132.1919 | 197 | 85 | 9221 | 180 | 1628 | 92 | 94 | 9466 | 182 | 1588 | 147 | 81 | 8369 | 213 | 1672 | 156 | 82 | 7872 | 223 | 1782 |
| Japan | Chugoku | | | Yamaguchi | 34.1813 | 131.0644 | 244 | 86 | 8672 | 224 | 1584 | 83 | 89 | 8676 | 163 | 1457 | 144 | 83 | 7733 | 203 | 1612 | 154 | 83 | 7287 | 213 | 1757 |
| Japan | Chugoku | | | Yamaguchi | 34.1844 | 131.0776 | 244 | 86 | 8702 | 223 | 1595 | 82 | 89 | 8721 | 163 | 1466 | 143 | 83 | 7758 | 202 | 1622 | 152 | 83 | 7320 | 212 | 1767 |
| Japan | Chugoku | | | Hiroshima | 34.434 | 132.4669 | 181 | 92 | 9179 | 178 | 1396 | 90 | 102 | 9421 | 190 | 1441 | 147 | 88 | 8325 | 213 | 1451 | 156 | 88 | 7834 | 221 | 1548 |
| Japan | Chugoku | | | Hiroshima | 34.4568 | 132.5043 | 190 | 91 | 9203 | 176 | 1406 | 86 | 101 | 9501 | 201 | 1448 | 143 | 87 | 8342 | 210 | 1460 | 152 | 87 | 7844 | 218 | 1556 |
| Japan | Chugoku | | | Okayama | 34.472 | 133.9162 | 136 | 92 | 9417 | 177 | 1035 | 91 | 105 | 9813 | 207 | 1081 | 142 | 87 | 8608 | 212 | 1111 | 151 | 88 | 8098 | 221 | 1171 |
| Japan | Chugoku | | | Okayama | 34.4929 | 133.817 | 135 | 92 | 9416 | 178 | 1009 | 91 | 104 | 9785 | 217 | 1062 | 144 | 87 | 8607 | 214 | 1087 | 153 | 88 | 8085 | 222 | 1144 |
| Japan | Chugoku | | | Okayama | 34.5337 | 133.6641 | 140 | 93 | 9419 | 178 | 1028 | 90 | 107 | 9858 | 217 | 1076 | 144 | 89 | 8597 | 213 | 1102 | 153 | 89 | 8078 | 221 | 1165 |
| Japan | Chugoku | | | Okayama | 34.557 | 133.7639 | 139 | 93 | 9457 | 176 | 1037 | 90 | 107 | 9915 | 218 | 1077 | 141 | 88 | 8652 | 212 | 1110 | 150 | 89 | 8135 | 220 | 1172 |
| Japan | Chugoku | | | Okayama | 34.5819 | 133.7956 | 139 | 93 | 9483 | 179 | 1033 | 90 | 109 | 9959 | 219 | 1086 | 144 | 88 | 8661 | 215 | 1108 | 153 | 89 | 8148 | 223 | 1169 |
| Japan | Chugoku | | | Okayama | 34.6042 | 133.8264 | 141 | 93 | 9509 | 181 | 1049 | 90 | 111 | 10055 | 214 | 1098 | 144 | 89 | 8704 | 216 | 1119 | 154 | 89 | 8185 | 224 | 1184 |
| Japan | Chugoku | | | Okayama | 34.6689 | 133.9557 | 144 | 95 | 9518 | 173 | 1154 | 91 | 116 | 10178 | 190 | 1154 | 136 | 91 | 8691 | 208 | 1223 | 145 | 92 | 8186 | 216 | 1290 |
| Japan | Chugoku | | | Okayama | 34.6823 | 133.977 | 145 | 95 | 9516 | 183 | 1104 | 90 | 119 | 10227 | 190 | 1166 | 145 | 91 | 8694 | 217 | 1173 | 154 | 91 | 8174 | 225 | 1241 |
| Japan | Chugoku | | | Okayama | 34.6907 | 133.9537 | 145 | 95 | 9501 | 183 | 1111 | 90 | 119 | 10260 | 191 | 1167 | 145 | 91 | 8700 | 217 | 1178 | 154 | 91 | 8166 | 226 | 1246 |
| Japan | Chugoku | | | Okayama | 34.7378 | 134.0389 | 155 | 97 | 9493 | 181 | 1147 | 86 | 124 | 10282 | 187 | 1210 | 144 | 93 | 8676 | 215 | 1211 | 153 | 94 | 8158 | 223 | 1281 |
| Japan | Chugoku | | | Okayama | 34.8659 | 134.0675 | 174 | 101 | 9602 | 220 | 1311 | 73 | 136 | 10584 | 185 | 1338 | 127 | 96 | 8748 | 200 | 1365 | 136 | 97 | 8233 | 208 | 1447 |
| Japan | Chugoku | | | Shimane | 35.3479 | 132.7605 | 387 | 86 | 9183 | 156 | 1656 | 69 | 97 | 9154 | 187 | 1493 | 137 | 82 | 8289 | 247 | 1706 | 146 | 82 | 7808 | 248 | 1808 |
| Japan | Chugoku | | | Tottori | 35.3951 | 134.2538 | 474 | 98 | 9410 | 156 | 1683 | 66 | 151 | 10756 | 191 | 1513 | 136 | 93 | 8512 | 32 | 1735 | 145 | 94 | 8027 | 250 | 1826 |
| Japan | Chugoku | | | Tottori | 35.4412 | 133.8158 | 363 | 96 | 9293 | 156 | 1620 | 69 | 146 | 10489 | 192 | 1466 | 136 | 91 | 8394 | 248 | 1668 | 145 | 91 | 7926 | 249 | 1765 |
| Japan | Chugoku | | | Tottori | 35.4489 | 133.3388 | 380 | 87 | 9134 | 158 | 1719 | 72 | 121 | 9802 | 189 | 1549 | 138 | 83 | 8270 | 248 | 1758 | 147 | 83 | 7786 | 249 | 1867 |
| Japan | Chugoku | | | Shimane | 35.4557 | 133.0795 | 398 | 87 | 9222 | 160 | 1736 | 72 | 110 | 9521 | 195 | 1557 | 140 | 83 | 8317 | 207 | 1775 | 149 | 83 | 7851 | 252 | 1886 |
| Japan | Chugoku | | | Shimane | 35.4576 | 133.0653 | 398 | 87 | 9205 | 159 | 1733 | 72 | 109 | 9465 | 194 | 1553 | 140 | 83 | 8306 | 206 | 1773 | 149 | 83 | 7834 | 251 | 1884 |
| Japan | Chugoku | | | Shimane | 35.47 | 133.0456 | 400 | 87 | 9175 | 160 | 1732 | 73 | 108 | 9449 | 195 | 1549 | 141 | 83 | 8267 | 207 | 1773 | 150 | 83 | 7797 | 252 | 1882 |
| Japan | Chugoku | | | Shimane | 35.4863 | 133.0764 | 403 | 87 | 9190 | 159 | 1748 | 72 | 109 | 9468 | 195 | 1562 | 140 | 83 | 8300 | 206 | 1788 | 149 | 83 | 7811 | 251 | 1898 |
| Japan | Kansai | | | Wakayama | 34.1467 | 135.2087 | 210 | 80 | 8912 | 174 | 1484 | 98 | 83 | 9264 | 213 | 1574 | 151 | 76 | 8094 | 249 | 1547 | 162 | 76 | 7582 | 226 | 1614 |
| Japan | Kansai | | | Wakayama | 34.2198 | 135.203 | 207 | 82 | 8963 | 173 | 1432 | 101 | 86 | 9358 | 217 | 1483 | 151 | 78 | 8179 | 250 | 1496 | 162 | 78 | 7636 | 227 | 1562 |
| Japan | Kansai | | | Wakayama | 34.223 | 135.1956 | 205 | 81 | 9002 | 173 | 1420 | 101 | 86 | 9370 | 217 | 1470 | 151 | 77 | 8207 | 250 | 1482 | 162 | 77 | 7675 | 227 | 1549 |
| Japan | Kansai | | | Osaka | 34.3326 | 135.7964 | 236 | 88 | 9105 | 201 | 2064 | 74 | 106 | 9711 | 193 | 2152 | 122 | 83 | 8193 | 221 | 2101 | 133 | 84 | 7746 | 228 | 2192 |
| Japan | Kansai | | | Osaka | 34.3984 | 135.3715 | 245 | 83 | 9067 | 165 | 1496 | 90 | 94 | 9606 | 209 | 1556 | 143 | 79 | 8261 | 242 | 1556 | 154 | 80 | 7728 | 254 | 1625 |
| Japan | Kansai | | | Osaka | 34.4295 | 135.5421 | 240 | 87 | 9181 | 217 | 1615 | 83 | 103 | 9814 | 204 | 1694 | 137 | 83 | 8349 | 239 | 1670 | 148 | 83 | 7810 | 245 | 1743 |
| Japan | Kansai | | | Osaka | 34.4685 | 135.4887 | 257 | 86 | 9125 | 222 | 1533 | 87 | 102 | 9750 | 208 | 1590 | 140 | 82 | 8313 | 249 | 1591 | 151 | 82 | 7773 | 253 | 1661 |
| Japan | Kansai | | | Osaka | 34.4719 | 135.4975 | 263 | 87 | 9133 | 222 | 1530 | 88 | 102 | 9761 | 208 | 1588 | 141 | 83 | 8325 | 250 | 1588 | 151 | 83 | 7768 | 253 | 1658 |
| Japan | Kansai | | | Osaka | 34.5373 | 135.6162 | 245 | 92 | 9198 | 225 | 1497 | 89 | 111 | 9946 | 211 | 1570 | 144 | 87 | 8359 | 246 | 1555 | 155 | 88 | 7839 | 257 | 1624 |
| Japan | Kansai | | | Osaka | 34.5375 | 135.4586 | 292 | 86 | 9127 | 164 | 1483 | 87 | 104 | 9792 | 208 | 1518 | 141 | 82 | 8338 | 251 | 1540 | 152 | 82 | 7791 | 254 | 1610 |
| Japan | Kansai | | | Osaka | 34.5397 | 135.5909 | 245 | 90 | 9239 | 224 | 1492 | 89 | 110 | 9930 | 211 | 1556 | 143 | 86 | 8396 | 245 | 1550 | 153 | 86 | 7877 | 256 | 1619 |
| Japan | Kansai | | | Osaka | 34.5647 | 135.4637 | 302 | 86 | 9113 | 164 | 1481 | 87 | 104 | 9813 | 208 | 1508 | 141 | 82 | 8324 | 251 | 1537 | 151 | 82 | 7771 | 253 | 1608 |
| Japan | Kansai | | | Osaka | 34.5656 | 135.4963 | 281 | 87 | 9160 | 164 | 1465 | 87 | 106 | 9834 | 209 | 1511 | 142 | 83 | 8363 | 252 | 1522 | 152 | 83 | 7811 | 255 | 1591 |
| Japan | Kansai | | | Osaka | 34.5722 | 135.494 | 281 | 87 | 9170 | 164 | 1457 | 87 | 106 | 9865 | 209 | 1500 | 142 | 82 | 8360 | 252 | 1516 | 152 | 83 | 7805 | 254 | 1584 |
| Japan | Kansai | | | Osaka | 34.5843 | 135.6333 | 235 | 93 | 9254 | 184 | 1452 | 88 | 113 | 10045 | 212 | 1540 | 146 | 88 | 8407 | 248 | 1513 | 156 | 89 | 7885 | 222 | 1581 |
| Japan | Kansai | | | Mie | 34.5891 | 136.5956 | 214 | 85 | 9034 | 227 | 1907 | 93 | 104 | 9725 | 213 | 2027 | 147 | 80 | 8112 | 228 | 1940 | 158 | 81 | 7641 | 230 | 2028 |
| Japan | Kansai | | | Osaka | 34.5971 | 135.4934 | 274 | 87 | 9184 | 164 | 1428 | 88 | 108 | 9959 | 210 | 1466 | 143 | 83 | 8379 | 253 | 1487 | 153 | 83 | 7831 | 256 | 1555 |
| Japan | Kansai | | | Nara | 34.599 | 135.6856 | 221 | 96 | 9311 | 184 | 1457 | 86 | 118 | 10162 | 214 | 1556 | 144 | 92 | 8466 | 247 | 1517 | 155 | 92 | 7929 | 222 | 1584 |
| Japan | Kansai | | | Osaka | 34.6129 | 135.5085 | 259 | 87 | 9217 | 166 | 1395 | 89 | 109 | 10014 | 212 | 1443 | 144 | 83 | 8406 | 255 | 1457 | 155 | 83 | 7852 | 258 | 1523 |
| Japan | Kansai | | | Osaka | 34.6266 | 135.6113 | 226 | 92 | 9313 | 185 | 1398 | 90 | 114 | 10116 | 215 | 1480 | 147 | 88 | 8487 | 250 | 1461 | 157 | 88 | 7948 | 224 | 1528 |
| Japan | Kansai | | | Nara | 34.6411 | 135.797 | 206 | 103 | 9376 | 184 | 1454 | 87 | 126 | 10173 | 216 | 1545 | 143 | 98 | 8501 | 247 | 1514 | 153 | 99 | 7985 | 221 | 1581 |
| Japan | Kansai | | | Osaka | 34.6633 | 135.5301 | 222 | 88 | 9320 | 186 | 1321 | 92 | 112 | 10152 | 207 | 1391 | 148 | 84 | 8512 | 216 | 1386 | 158 | 84 | 7956 | 224 | 1451 |
| Japan | Kansai | | | Osaka | 34.6708 | 135.5231 | 218 | 87 | 9346 | 187 | 1321 | 92 | 112 | 10170 | 199 | 1383 | 148 | 83 | 8527 | 217 | 1384 | 158 | 83 | 7968 | 226 | 1451 |
| Japan | Kansai | | | Nara | 34.6739 | 135.8405 | 194 | 106 | 9443 | 180 | 1413 | 81 | 127 | 10290 | 211 | 1558 | 139 | 102 | 8557 | 244 | 1473 | 149 | 102 | 8046 | 219 | 1540 |
| Japan | Kansai | | | Mie | 34.6786 | 136.5054 | 197 | 86 | 9129 | 225 | 1743 | 91 | 105 | 9867 | 212 | 1857 | 145 | 81 | 8198 | 227 | 1785 | 155 | 82 | 7705 | 255 | 1866 |
| Japan | Kansai | | | Nara | 34.687 | 135.7469 | 198 | 101 | 9468 | 181 | 1411 | 84 | 125 | 10308 | 215 | 1502 | 140 | 96 | 8597 | 245 | 1468 | 150 | 97 | 8062 | 219 | 1538 |
| Japan | Kansai | | | Osaka | 34.7093 | 135.6394 | 211 | 94 | 9377 | 188 | 1373 | 90 | 119 | 10322 | 220 | 1448 | 148 | 89 | 8533 | 253 | 1434 | 159 | 90 | 7982 | 227 | 1502 |
| Japan | Kansai | | | Osaka | 34.711 | 135.496 | 218 | 87 | 9360 | 187 | 1320 | 93 | 112 | 10214 | 199 | 1377 | 149 | 83 | 8556 | 217 | 1381 | 159 | 83 | 8006 | 226 | 1449 |
| Japan | Kansai | | | Osaka | 34.7121 | 135.5078 | 217 | 87 | 9362 | 188 | 1319 | 93 | 113 | 10231 | 194 | 1379 | 149 | 83 | 8532 | 218 | 1382 | 159 | 83 | 7972 | 227 | 1449 |
| Japan | Kansai | | | Kyoto | 34.7203 | 135.7944 | 196 | 104 | 9481 | 183 | 1395 | 86 | 128 | 10317 | 216 | 1490 | 142 | 99 | 8617 | 247 | 1456 | 152 | 99 | 8082 | 222 | 1523 |
| Japan | Kansai | | | Nara | 34.7211 | 135.7605 | 196 | 102 | 9503 | 182 | 1400 | 85 | 126 | 10344 | 216 | 1487 | 140 | 97 | 8622 | 246 | 1459 | 151 | 97 | 8088 | 220 | 1526 |
| Japan | Kansai | | | Osaka | 34.7227 | 135.56 | 210 | 90 | 9399 | 189 | 1334 | 93 | 115 | 10264 | 223 | 1397 | 150 | 86 | 8544 | 219 | 1395 | 160 | 86 | 8006 | 228 | 1463 |
| Japan | Kansai | | | Osaka | 34.7376 | 135.5444 | 210 | 90 | 9408 | 189 | 1330 | 93 | 115 | 10290 | 211 | 1395 | 150 | 85 | 8579 | 219 | 1393 | 160 | 85 | 8037 | 228 | 1461 |
| Japan | Kansai | | | Osaka | 34.7638 | 135.6768 | 201 | 96 | 9500 | 186 | 1394 | 86 | 122 | 10441 | 219 | 1479 | 145 | 92 | 8650 | 251 | 1452 | 155 | 92 | 8107 | 225 | 1521 |
| Japan | Kansai | | | Kyoto | 34.7715 | 135.9961 | 193 | 104 | 9524 | 178 | 1465 | 72 | 126 | 10425 | 204 | 1605 | 137 | 99 | 8627 | 243 | 1522 | 147 | 99 | 8109 | 248 | 1591 |
| Japan | Kansai | | | Osaka | 34.7844 | 135.6646 | 204 | 95 | 9484 | 188 | 1395 | 89 | 122 | 10436 | 222 | 1463 | 147 | 91 | 8614 | 253 | 1452 | 157 | 91 | 8092 | 226 | 1522 |
| Japan | Kansai | | | Osaka | 34.7959 | 135.5508 | 207 | 90 | 9470 | 190 | 1359 | 92 | 118 | 10392 | 219 | 1421 | 149 | 85 | 8595 | 219 | 1419 | 159 | 86 | 8056 | 228 | 1489 |
| Japan | Kansai | | | Osaka | 34.7967 | 135.6431 | 204 | 94 | 9501 | 189 | 1392 | 91 | 122 | 10411 | 223 | 1458 | 148 | 89 | 8649 | 254 | 1452 | 158 | 90 | 8107 | 227 | 1521 |
| Japan | Kansai | | | Hyogo | 34.7992 | 135.3322 | 208 | 84 | 9472 | 179 | 1379 | 81 | 114 | 10398 | 182 | 1429 | 139 | 80 | 8622 | 209 | 1435 | 149 | 80 | 8064 | 217 | 1509 |
| Japan | Kansai | | | Osaka | 34.8061 | 135.5524 | 210 | 91 | 9461 | 190 | 1368 | 92 | 118 | 10397 | 223 | 1428 | 149 | 86 | 8611 | 219 | 1427 | 159 | 86 | 8063 | 228 | 1497 |
| Japan | Kansai | | | Kyoto | 34.8159 | 135.7688 | 201 | 100 | 9511 | 186 | 1434 | 88 | 126 | 10403 | 220 | 1511 | 145 | 95 | 8630 | 250 | 1490 | 155 | 95 | 8104 | 224 | 1560 |
| Japan | Kansai | | | Hyogo | 34.8178 | 135.2162 | 206 | 84 | 9465 | 173 | 1392 | 73 | 114 | 10426 | 174 | 1460 | 133 | 80 | 8617 | 203 | 1449 | 143 | 80 | 8068 | 212 | 1524 |
| Japan | Kansai | | | Hyogo | 34.8203 | 135.2163 | 206 | 84 | 9465 | 173 | 1392 | 73 | 114 | 10426 | 174 | 1460 | 133 | 80 | 8617 | 203 | 1449 | 143 | 80 | 8068 | 212 | 1524 |
| Japan | Kansai | | | Osaka | 34.8219 | 135.4689 | 211 | 88 | 9455 | 187 | 1361 | 87 | 116 | 10455 | 194 | 1430 | 147 | 83 | 8599 | 217 | 1420 | 157 | 83 | 8061 | 225 | 1491 |
| Japan | Kansai | | | Osaka | 34.8225 | 135.5976 | 209 | 92 | 9467 | 190 | 1392 | 92 | 120 | 10424 | 224 | 1455 | 149 | 88 | 8595 | 255 | 1451 | 159 | 88 | 8046 | 228 | 1521 |
| Japan | Kansai | | | Hyogo | 34.8369 | 135.3671 | 212 | 85 | 9508 | 181 | 1382 | 82 | 116 | 10477 | 196 | 1436 | 140 | 81 | 8662 | 211 | 1438 | 150 | 81 | 8123 | 220 | 1512 |
| Japan | Kansai | | | Osaka | 34.8375 | 135.5908 | 211 | 92 | 9529 | 190 | 1401 | 90 | 121 | 10479 | 224 | 1461 | 149 | 87 | 8647 | 255 | 1460 | 159 | 87 | 8118 | 228 | 1530 |
| Japan | Kansai | | | Osaka | 34.8437 | 135.5721 | 211 | 91 | 9509 | 190 | 1396 | 90 | 121 | 10490 | 224 | 1455 | 149 | 87 | 8632 | 255 | 1453 | 159 | 87 | 8119 | 228 | 1525 |
| Japan | Kansai | | | Hyogo | 34.8468 | 135.4058 | 214 | 86 | 9480 | 184 | 1377 | 85 | 119 | 10519 | 212 | 1424 | 144 | 82 | 8591 | 214 | 1436 | 153 | 82 | 8073 | 222 | 1507 |
| Japan | Kansai | | | Osaka | 34.8473 | 135.6697 | 208 | 95 | 9515 | 189 | 1435 | 90 | 124 | 10494 | 223 | 1498 | 148 | 91 | 8610 | 254 | 1493 | 158 | 91 | 8093 | 227 | 1564 |
| Japan | Kansai | | | Osaka | 34.8576 | 135.6394 | 211 | 94 | 9521 | 190 | 1433 | 90 | 124 | 10514 | 224 | 1487 | 149 | 89 | 8620 | 254 | 1490 | 159 | 90 | 8097 | 228 | 1562 |
| Japan | Kansai | | | Hyogo | 34.8629 | 134.676 | 185 | 100 | 9487 | 178 | 1268 | 80 | 136 | 10574 | 184 | 1319 | 141 | 95 | 8649 | 211 | 1330 | 151 | 95 | 8127 | 220 | 1403 |
| Japan | Kansai | | | Hyogo | 34.8679 | 135.4198 | 218 | 87 | 9468 | 186 | 1374 | 83 | 119 | 10570 | 217 | 1446 | 146 | 83 | 8620 | 216 | 1432 | 156 | 83 | 8085 | 225 | 1505 |
| Japan | Kansai | | | Hyogo | 34.8724 | 134.3148 | 192 | 101 | 9473 | 177 | 1266 | 73 | 137 | 10586 | 179 | 1353 | 139 | 97 | 8647 | 210 | 1323 | 148 | 97 | 8114 | 219 | 1400 |
| Japan | Kansai | | | Osaka | 34.8743 | 135.6685 | 211 | 95 | 9523 | 189 | 1459 | 87 | 124 | 10529 | 221 | 1522 | 148 | 90 | 8629 | 254 | 1515 | 158 | 91 | 8110 | 259 | 1588 |
| Japan | Kansai | | | Hyogo | 34.8789 | 135.4168 | 217 | 87 | 9536 | 183 | 1403 | 83 | 120 | 10576 | 217 | 1450 | 141 | 82 | 8661 | 212 | 1460 | 151 | 83 | 8126 | 221 | 1533 |
| Japan | Kansai | | | Osaka | 34.8809 | 135.6834 | 212 | 95 | 9546 | 189 | 1469 | 87 | 124 | 10527 | 221 | 1534 | 148 | 90 | 8637 | 254 | 1526 | 158 | 91 | 8135 | 260 | 1598 |
| Japan | Kansai | | | Kyoto | 34.9347 | 135.7842 | 215 | 97 | 9567 | 187 | 1521 | 86 | 125 | 10541 | 220 | 1573 | 146 | 92 | 8672 | 252 | 1575 | 156 | 93 | 8152 | 258 | 1650 |
| Japan | Kansai | | | Kyoto | 34.9387 | 135.7697 | 211 | 97 | 9594 | 185 | 1529 | 87 | 125 | 10548 | 221 | 1579 | 144 | 92 | 8711 | 250 | 1583 | 154 | 92 | 8185 | 256 | 1658 |
| Japan | Kansai | | | Shiga | 34.9509 | 136.1524 | 210 | 97 | 9600 | 174 | 1498 | 74 | 118 | 10469 | 205 | 1556 | 132 | 91 | 8675 | 238 | 1550 | 142 | 92 | 8176 | 244 | 1625 |
| Japan | Kansai | | | Kyoto | 34.9567 | 135.6773 | 218 | 94 | 9559 | 241 | 1549 | 84 | 124 | 10600 | 218 | 1600 | 146 | 89 | 8670 | 253 | 1602 | 156 | 90 | 8125 | 258 | 1679 |
| Japan | Kansai | | | Kyoto | 34.9684 | 135.773 | 219 | 96 | 9558 | 186 | 1554 | 86 | 124 | 10571 | 220 | 1602 | 145 | 91 | 8673 | 252 | 1607 | 155 | 92 | 8129 | 257 | 1683 |
| Japan | Kansai | | | Mie | 34.9705 | 136.5943 | 189 | 91 | 9311 | 223 | 1594 | 87 | 106 | 9986 | 209 | 1642 | 142 | 85 | 8371 | 243 | 1643 | 152 | 86 | 7851 | 249 | 1718 |
| Japan | Kansai | | | Kyoto | 34.971 | 135.7021 | 223 | 94 | 9594 | 242 | 1572 | 88 | 125 | 10570 | 222 | 1619 | 147 | 90 | 8700 | 254 | 1625 | 157 | 90 | 8179 | 259 | 1702 |
| Japan | Kansai | | | Kyoto | 34.9878 | 135.7448 | 226 | 95 | 9596 | 241 | 1583 | 87 | 125 | 10584 | 221 | 1624 | 146 | 90 | 8710 | 253 | 1635 | 156 | 91 | 8194 | 258 | 1712 |
| Japan | Kansai | | | Kyoto | 34.9973 | 135.5774 | 233 | 91 | 9609 | 235 | 1533 | 75 | 124 | 10708 | 211 | 1576 | 140 | 86 | 8730 | 247 | 1585 | 149 | 87 | 8188 | 252 | 1664 |
| Japan | Kansai | | | Kyoto | 35.0099 | 135.7835 | 227 | 95 | 9592 | 239 | 1583 | 84 | 124 | 10610 | 217 | 1616 | 144 | 91 | 8708 | 251 | 1633 | 154 | 91 | 8183 | 256 | 1712 |
| Japan | Kansai | | | Shiga | 35.0228 | 135.8534 | 225 | 95 | 9602 | 180 | 1568 | 77 | 122 | 10601 | 210 | 1592 | 139 | 90 | 8712 | 245 | 1618 | 149 | 91 | 8183 | 250 | 1696 |
| Japan | Kansai | | | Kyoto | 35.0272 | 135.7971 | 231 | 95 | 9619 | 237 | 1589 | 78 | 123 | 10640 | 211 | 1610 | 142 | 90 | 8728 | 249 | 1638 | 152 | 91 | 8211 | 254 | 1717 |
| Japan | Kansai | | | Kyoto | 35.0293 | 135.7089 | 235 | 93 | 9590 | 238 | 1613 | 82 | 125 | 10658 | 217 | 1633 | 143 | 89 | 8711 | 250 | 1661 | 153 | 89 | 8175 | 255 | 1743 |
| Japan | Kansai | | | Kyoto | 35.0406 | 135.7714 | 237 | 94 | 9618 | 238 | 1604 | 84 | 124 | 10624 | 218 | 1624 | 143 | 89 | 8721 | 250 | 1653 | 152 | 90 | 8187 | 255 | 1732 |
| Japan | Kansai | | | Shiga | 35.0471 | 136.1438 | 238 | 93 | 9609 | 175 | 1527 | 77 | 114 | 10395 | 208 | 1542 | 134 | 88 | 8684 | 240 | 1580 | 144 | 88 | 8142 | 245 | 1655 |
| Japan | Kansai | | | Mie | 35.0599 | 135.658 | 252 | 89 | 9691 | 220 | 1614 | 60 | 121 | 10771 | 196 | 1665 | 125 | 84 | 8796 | 233 | 1661 | 134 | 85 | 8282 | 238 | 1745 |
| Japan | Kansai | | | Shiga | 35.0602 | 136.0143 | 244 | 94 | 9586 | 176 | 1545 | 79 | 117 | 10481 | 211 | 1557 | 136 | 89 | 8676 | 242 | 1598 | 146 | 89 | 8125 | 247 | 1674 |
| Japan | Kansai | | | Shiga | 35.0764 | 135.9562 | 249 | 94 | 9591 | 178 | 1564 | 80 | 119 | 10494 | 212 | 1572 | 137 | 89 | 8708 | 244 | 1616 | 147 | 89 | 8164 | 249 | 1693 |
| Japan | Kansai | | | Shiga | 35.0942 | 136.1852 | 249 | 90 | 9594 | 175 | 1546 | 77 | 110 | 10383 | 207 | 1544 | 133 | 85 | 8658 | 239 | 1597 | 143 | 86 | 8121 | 244 | 1673 |
| Japan | Kansai | | | Shiga | 35.0946 | 136.2279 | 245 | 90 | 9589 | 173 | 1554 | 76 | 109 | 10375 | 206 | 1550 | 132 | 85 | 8655 | 237 | 1604 | 142 | 85 | 8107 | 242 | 1680 |
| Japan | Kansai | | | Shiga | 35.0954 | 136.1944 | 248 | 90 | 9556 | 174 | 1547 | 77 | 110 | 10381 | 207 | 1545 | 133 | 85 | 8643 | 239 | 1598 | 143 | 86 | 8108 | 244 | 1674 |
| Japan | Kansai | | | Shiga | 35.1191 | 136.2068 | 256 | 89 | 9578 | 174 | 1556 | 77 | 108 | 10375 | 207 | 1543 | 133 | 84 | 8660 | 239 | 1607 | 143 | 84 | 8125 | 244 | 1683 |
| Japan | Kansai | | | Shiga | 35.1223 | 136.0685 | 271 | 91 | 9587 | 177 | 1570 | 79 | 113 | 10460 | 210 | 1548 | 136 | 86 | 8667 | 242 | 1619 | 146 | 86 | 8115 | 247 | 1698 |
| Japan | Kansai | | | Shiga | 35.1375 | 135.918 | 278 | 91 | 9636 | 177 | 1620 | 78 | 118 | 10552 | 211 | 1597 | 136 | 86 | 8722 | 243 | 1667 | 146 | 87 | 8188 | 248 | 1748 |
| Japan | Kansai | | | Shiga | 35.1397 | 136.0325 | 279 | 91 | 9580 | 177 | 1588 | 80 | 114 | 10464 | 211 | 1563 | 136 | 86 | 8683 | 243 | 1636 | 146 | 86 | 8135 | 248 | 1717 |
| Japan | Kansai | | | Shiga | 35.1454 | 135.9185 | 279 | 91 | 9625 | 178 | 1612 | 79 | 117 | 10536 | 211 | 1593 | 137 | 86 | 8722 | 244 | 1661 | 147 | 87 | 8191 | 249 | 1741 |
| Japan | Kansai | | | Shiga | 35.204 | 136.308 | 279 | 86 | 9599 | 171 | 1629 | 71 | 103 | 10395 | 201 | 1606 | 129 | 80 | 8697 | 235 | 1674 | 139 | 81 | 8164 | 240 | 1756 |
| Japan | Kansai | | | Shiga | 35.2242 | 136.2266 | 303 | 84 | 9564 | 174 | 1605 | 78 | 103 | 10349 | 208 | 1544 | 134 | 79 | 8654 | 240 | 1652 | 144 | 80 | 8097 | 212 | 1732 |
| Japan | Kansai | | | Shiga | 35.2273 | 136.2635 | 296 | 85 | 9574 | 174 | 1606 | 78 | 102 | 10335 | 207 | 1553 | 133 | 79 | 8654 | 239 | 1654 | 143 | 80 | 8106 | 211 | 1735 |
| Japan | Kansai | | | Shiga | 35.2293 | 136.1838 | 315 | 85 | 9597 | 176 | 1617 | 79 | 104 | 10359 | 209 | 1555 | 135 | 80 | 8685 | 241 | 1668 | 145 | 80 | 8140 | 214 | 1747 |
| Japan | Kansai | | | Shiga | 35.2529 | 136.2592 | 311 | 83 | 9585 | 174 | 1616 | 78 | 101 | 10326 | 207 | 1552 | 134 | 78 | 8666 | 240 | 1663 | 144 | 79 | 8121 | 212 | 1744 |
| Japan | Kansai | | | Shiga | 35.2591 | 136.2512 | 317 | 83 | 9563 | 174 | 1620 | 78 | 101 | 10320 | 207 | 1550 | 135 | 78 | 8669 | 203 | 1667 | 144 | 78 | 8122 | 212 | 1747 |
| Japan | Kansai | | | Shiga | 35.2618 | 136.2283 | 321 | 83 | 9540 | 174 | 1626 | 79 | 101 | 10323 | 207 | 1545 | 135 | 78 | 8648 | 203 | 1672 | 145 | 78 | 8099 | 212 | 1753 |
| Japan | Kansai | | | Shiga | 35.2896 | 136.0095 | 348 | 85 | 9717 | 219 | 1743 | 73 | 109 | 10473 | 205 | 1619 | 122 | 80 | 8805 | 230 | 1788 | 132 | 80 | 8273 | 235 | 1875 |
| Japan | Kansai | | | Shiga | 35.3528 | 136.3535 | 342 | 84 | 9641 | 174 | 1740 | 74 | 97 | 10311 | 202 | 1650 | 133 | 79 | 8725 | 238 | 1781 | 142 | 79 | 8178 | 211 | 1869 |
| Japan | Kansai | | | Shiga | 35.3719 | 136.3585 | 356 | 84 | 9660 | 173 | 1771 | 74 | 97 | 10314 | 201 | 1662 | 131 | 79 | 8745 | 237 | 1812 | 141 | 79 | 8191 | 210 | 1901 |
| Japan | Kansai | | | Shiga | 35.3866 | 136.2803 | 388 | 82 | 9641 | 175 | 1768 | 78 | 97 | 10302 | 205 | 1632 | 134 | 77 | 8703 | 240 | 1810 | 144 | 78 | 8146 | 212 | 1897 |
| Japan | Kansai | | | Shiga | 35.3869 | 136.2665 | 394 | 82 | 9627 | 175 | 1769 | 78 | 97 | 10300 | 205 | 1629 | 134 | 77 | 8706 | 240 | 1811 | 144 | 78 | 8151 | 212 | 1898 |
| Japan | Kansai | | | Shiga | 35.4105 | 136.2816 | 403 | 82 | 9639 | 175 | 1797 | 77 | 97 | 10308 | 203 | 1653 | 134 | 77 | 8711 | 240 | 1841 | 143 | 78 | 8161 | 212 | 1928 |
| Japan | Kansai | | | Shiga | 35.4618 | 136.2186 | 462 | 82 | 9641 | 174 | 1868 | 76 | 97 | 10272 | 201 | 1680 | 133 | 77 | 8709 | 239 | 1910 | 143 | 77 | 8167 | 212 | 2000 |
| Japan | Kansai | | | Shiga | 35.4622 | 136.2431 | 462 | 82 | 9659 | 174 | 1876 | 74 | 97 | 10292 | 199 | 1692 | 133 | 77 | 8726 | 239 | 1917 | 142 | 77 | 8173 | 211 | 2008 |
| Japan | Kansai | | | Shiga | 35.4698 | 136.2197 | 468 | 82 | 9644 | 174 | 1880 | 76 | 97 | 10278 | 201 | 1688 | 133 | 77 | 8696 | 239 | 1921 | 143 | 77 | 8147 | 211 | 2012 |
| Japan | Kansai | | | Shiga | 35.4705 | 136.2318 | 471 | 82 | 9655 | 174 | 1888 | 75 | 97 | 10283 | 200 | 1695 | 133 | 76 | 8726 | 238 | 1929 | 142 | 77 | 8172 | 211 | 2020 |
| Japan | Kansai | | | Hyogo | 35.4983 | 134.8016 | 580 | 98 | 9592 | 19 | 1820 | 66 | 153 | 10936 | 194 | 1542 | 136 | 93 | 8652 | 30 | 1876 | 145 | 93 | 8200 | 43 | 1961 |
| Japan | Kanto | | | Kanagawa | 35.335 | 139.5289 | 186 | 87 | 8664 | 181 | 1495 | 78 | 134 | 10298 | 170 | 1528 | 143 | 82 | 7587 | 220 | 1555 | 154 | 83 | 7221 | 222 | 1618 |
| Japan | Kanto | | | Kanagawa | 35.336 | 139.4792 | 186 | 89 | 8681 | 182 | 1487 | 78 | 135 | 10247 | 159 | 1519 | 145 | 84 | 7620 | 221 | 1547 | 155 | 85 | 7251 | 224 | 1609 |
| Japan | Kanto | | | Kanagawa | 35.3461 | 139.4812 | 184 | 90 | 8710 | 183 | 1471 | 77 | 136 | 10310 | 158 | 1508 | 144 | 85 | 7652 | 221 | 1531 | 154 | 86 | 7278 | 223 | 1592 |
| Japan | Kanto | | | Kanagawa | 35.3538 | 139.5179 | 185 | 88 | 8663 | 183 | 1471 | 77 | 136 | 10327 | 161 | 1514 | 145 | 83 | 7619 | 222 | 1531 | 155 | 84 | 7227 | 224 | 1593 |
| Japan | Kanto | | | Kanagawa | 35.3729 | 139.4449 | 178 | 92 | 8773 | 181 | 1448 | 75 | 138 | 10373 | 191 | 1487 | 142 | 88 | 7695 | 219 | 1511 | 152 | 88 | 7323 | 221 | 1570 |
| Japan | Kanto | | | Kanagawa | 35.4122 | 139.3446 | 173 | 96 | 8881 | 217 | 1432 | 75 | 140 | 10389 | 199 | 1470 | 141 | 91 | 7816 | 220 | 1495 | 152 | 92 | 7415 | 222 | 1555 |
| Japan | Kanto | | | Kanagawa | 35.4272 | 139.3304 | 170 | 97 | 8906 | 215 | 1433 | 74 | 140 | 10386 | 198 | 1470 | 140 | 92 | 7860 | 219 | 1497 | 150 | 93 | 7435 | 220 | 1556 |
| Japan | Kanto | | | Kanagawa | 35.444 | 139.6073 | 175 | 85 | 8774 | 183 | 1432 | 77 | 133 | 10522 | 176 | 1492 | 144 | 80 | 7696 | 221 | 1496 | 154 | 80 | 7308 | 223 | 1555 |
| Japan | Kanto | | | Kanagawa | 35.5191 | 139.3795 | 160 | 99 | 9037 | 215 | 1367 | 70 | 141 | 10547 | 196 | 1427 | 139 | 93 | 7988 | 219 | 1434 | 149 | 94 | 7561 | 220 | 1491 |
| Japan | Kanto | | | Kanagawa | 35.5299 | 139.7088 | 171 | 82 | 8811 | 186 | 1378 | 78 | 130 | 10599 | 160 | 1455 | 147 | 77 | 7753 | 224 | 1448 | 157 | 77 | 7348 | 226 | 1503 |
| Japan | Kanto | | | Kanagawa | 35.5299 | 139.6928 | 171 | 82 | 8848 | 186 | 1380 | 78 | 130 | 10614 | 160 | 1457 | 146 | 77 | 7798 | 224 | 1450 | 157 | 78 | 7385 | 226 | 1505 |
| Japan | Kanto | | | Kanagawa | 35.5706 | 139.7192 | 166 | 81 | 8877 | 186 | 1355 | 78 | 130 | 10624 | 161 | 1437 | 147 | 77 | 7803 | 224 | 1425 | 157 | 77 | 7390 | 226 | 1479 |
| Japan | Kanto | | | Kanagawa | 35.586 | 139.5194 | 157 | 93 | 9010 | 215 | 1358 | 72 | 137 | 10653 | 198 | 1434 | 139 | 87 | 7947 | 219 | 1431 | 150 | 88 | 7538 | 220 | 1484 |
| Japan | Kanto | | | Kanagawa | 35.6265 | 139.6819 | 159 | 84 | 8946 | 218 | 1345 | 76 | 129 | 10669 | 159 | 1431 | 144 | 79 | 7878 | 222 | 1418 | 154 | 80 | 7451 | 223 | 1471 |
| Japan | Kanto | | | Kanagawa | 35.6399 | 139.2557 | 144 | 104 | 9335 | 201 | 1399 | 58 | 141 | 10738 | 186 | 1459 | 125 | 99 | 8251 | 205 | 1469 | 135 | 100 | 7847 | 206 | 1527 |
| Japan | Kanto | | | Kanagawa | 35.6445 | 139.6324 | 156 | 87 | 8994 | 217 | 1345 | 75 | 131 | 10660 | 158 | 1429 | 142 | 81 | 7952 | 221 | 1417 | 152 | 82 | 7534 | 222 | 1471 |
| Japan | Kanto | | | Kanagawa | 35.6452 | 139.6033 | 155 | 88 | 9041 | 217 | 1348 | 74 | 133 | 10694 | 157 | 1431 | 142 | 83 | 7986 | 221 | 1420 | 152 | 84 | 7576 | 222 | 1474 |
| Japan | Kanto | | | Kanagawa | 35.6541 | 139.7191 | 158 | 83 | 8941 | 219 | 1328 | 77 | 128 | 10664 | 160 | 1415 | 145 | 77 | 7893 | 223 | 1401 | 155 | 78 | 7467 | 225 | 1454 |
| Japan | Kanto | | | Kanagawa | 35.6617 | 139.7191 | 158 | 83 | 8941 | 219 | 1328 | 77 | 128 | 10664 | 160 | 1415 | 145 | 77 | 7893 | 223 | 1401 | 155 | 78 | 7467 | 225 | 1454 |
| Japan | Kanto | | | Kanagawa | 35.6633 | 139.73 | 157 | 82 | 8946 | 219 | 1325 | 77 | 127 | 10654 | 160 | 1412 | 145 | 77 | 7904 | 223 | 1399 | 155 | 78 | 7469 | 224 | 1451 |
| Japan | Kanto | | | Kanagawa | 35.6721 | 139.7181 | 156 | 83 | 8979 | 219 | 1324 | 76 | 127 | 10667 | 159 | 1416 | 145 | 78 | 7943 | 223 | 1397 | 155 | 79 | 7506 | 224 | 1450 |
| Japan | Kanto | | | Kanagawa | 35.6743 | 139.7285 | 156 | 82 | 8946 | 220 | 1319 | 77 | 126 | 10653 | 160 | 1411 | 145 | 77 | 7917 | 224 | 1392 | 155 | 78 | 7470 | 225 | 1445 |
| Japan | Kanto | | | Kanagawa | 35.6791 | 139.5432 | 151 | 92 | 9114 | 214 | 1348 | 72 | 132 | 10662 | 198 | 1431 | 139 | 87 | 8057 | 219 | 1420 | 149 | 87 | 7622 | 220 | 1475 |
| Japan | Kanto | | | Kanagawa | 35.6796 | 139.5534 | 151 | 91 | 9122 | 214 | 1347 | 72 | 132 | 10659 | 198 | 1430 | 139 | 86 | 8062 | 218 | 1420 | 149 | 87 | 7625 | 219 | 1474 |
| Japan | Kanto | | | Saitama | 35.693 | 140.09 | 175 | 84 | 8903 | 216 | 1281 | 73 | 128 | 10620 | 157 | 1382 | 141 | 79 | 7859 | 220 | 1361 | 151 | 80 | 7436 | 222 | 1409 |
| Japan | Kanto | | | Saitama | 35.6956 | 140.0808 | 172 | 85 | 8920 | 216 | 1276 | 73 | 128 | 10645 | 157 | 1380 | 140 | 80 | 7892 | 220 | 1357 | 151 | 80 | 7454 | 222 | 1405 |
| Japan | Kanto | | | Kanagawa | 35.7012 | 139.6238 | 151 | 88 | 9059 | 216 | 1332 | 73 | 129 | 10682 | 183 | 1427 | 141 | 84 | 8027 | 221 | 1406 | 152 | 84 | 7574 | 222 | 1460 |
| Japan | Kanto | | | Kanagawa | 35.7047 | 139.6027 | 149 | 89 | 9074 | 215 | 1333 | 73 | 130 | 10696 | 200 | 1430 | 140 | 85 | 8015 | 219 | 1409 | 150 | 85 | 7590 | 221 | 1462 |
| Japan | Kanto | | | Kanagawa | 35.7059 | 139.5541 | 148 | 92 | 9123 | 214 | 1343 | 71 | 131 | 10670 | 198 | 1430 | 139 | 87 | 8067 | 219 | 1417 | 149 | 87 | 7628 | 220 | 1472 |
| Japan | Kanto | | | Kanagawa | 35.7207 | 139.5419 | 147 | 93 | 9123 | 213 | 1346 | 71 | 132 | 10688 | 198 | 1434 | 138 | 88 | 8066 | 217 | 1419 | 148 | 88 | 7625 | 218 | 1474 |
| Japan | Kanto | | | Saitama | 35.8126 | 139.6933 | 144 | 89 | 9136 | 218 | 1292 | 75 | 129 | 10724 | 202 | 1398 | 142 | 85 | 8093 | 222 | 1368 | 152 | 85 | 7625 | 223 | 1420 |
| Japan | Kanto | | | Saitama | 35.8213 | 139.6843 | 144 | 90 | 9142 | 217 | 1293 | 75 | 128 | 10710 | 202 | 1398 | 142 | 85 | 8091 | 221 | 1369 | 152 | 86 | 7624 | 222 | 1421 |
| Japan | Kanto | | | Saitama | 35.9122 | 139.8184 | 137 | 94 | 9243 | 215 | 1244 | 72 | 127 | 10771 | 170 | 1361 | 139 | 89 | 8215 | 220 | 1323 | 149 | 90 | 7745 | 221 | 1372 |
| Japan | Kanto | | | Saitama | 35.9209 | 139.4074 | 124 | 99 | 9273 | 212 | 1287 | 71 | 129 | 10552 | 197 | 1385 | 136 | 94 | 8249 | 217 | 1367 | 146 | 95 | 7759 | 246 | 1416 |
| Japan | Kanto | | | Saitama | 35.9211 | 139.3933 | 124 | 100 | 9281 | 211 | 1290 | 71 | 129 | 10549 | 197 | 1384 | 135 | 94 | 8236 | 216 | 1370 | 145 | 95 | 7753 | 245 | 1419 |
| Japan | Kanto | | | Kanagawa | 35.9782 | 139.4916 | 121 | 99 | 9292 | 213 | 1250 | 72 | 128 | 10609 | 198 | 1357 | 137 | 93 | 8267 | 219 | 1335 | 147 | 94 | 7777 | 248 | 1381 |
| Japan | Kanto | | | Kanagawa | 35.9934 | 139.431 | 116 | 100 | 9342 | 214 | 1242 | 71 | 128 | 10601 | 198 | 1349 | 137 | 95 | 8304 | 218 | 1325 | 147 | 96 | 7833 | 248 | 1372 |
| Japan | Kanto | | | Saitama | 36.0624 | 139.6685 | 118 | 99 | 9433 | 213 | 1211 | 71 | 126 | 10778 | 199 | 1332 | 137 | 94 | 8424 | 219 | 1298 | 146 | 95 | 7923 | 219 | 1342 |
| Japan | Kanto | | | Saitama | 36.0788 | 139.494 | 109 | 101 | 9417 | 213 | 1199 | 72 | 126 | 10650 | 198 | 1311 | 136 | 96 | 8408 | 238 | 1285 | 146 | 97 | 7890 | 248 | 1331 |
| Japan | Kyushu | | | Kagoshima | 31.4979 | 130.5054 | 313 | 86 | 8077 | 242 | 2205 | 111 | 103 | 9062 | 192 | 2026 | 168 | 83 | 7265 | 255 | 2262 | 178 | 83 | 7031 | 237 | 2332 |
| Japan | Kyushu | | | Kagoshima | 31.5491 | 130.5196 | 308 | 87 | 8204 | 240 | 2234 | 115 | 105 | 9174 | 197 | 1979 | 165 | 84 | 7384 | 253 | 2293 | 175 | 84 | 7144 | 235 | 2364 |
| Japan | Kyushu | | | Kagoshima | 31.6224 | 130.5391 | 300 | 89 | 8270 | 241 | 2209 | 109 | 106 | 9220 | 193 | 2038 | 164 | 86 | 7459 | 254 | 2269 | 175 | 86 | 7206 | 236 | 2341 |
| Japan | Kyushu | | | Kagoshima | 31.6224 | 130.5652 | 305 | 89 | 8272 | 236 | 2294 | 109 | 106 | 9237 | 192 | 2053 | 159 | 86 | 7446 | 248 | 2354 | 169 | 86 | 7197 | 231 | 2426 |
| Japan | Kyushu | | | Miyazaki | 32.5059 | 131.6765 | 229 | 99 | 8247 | 261 | 2302 | 110 | 109 | 8594 | 218 | 2320 | 156 | 97 | 7409 | 244 | 2367 | 166 | 97 | 7035 | 252 | 2449 |
| Japan | Kyushu | | | Kumamoto | 32.5073 | 130.6046 | 233 | 99 | 8859 | 239 | 1879 | 106 | 106 | 9383 | 194 | 1820 | 156 | 96 | 8070 | 253 | 1948 | 166 | 96 | 7694 | 232 | 2034 |
| Japan | Kyushu | | | Kumamoto | 32.7739 | 130.7603 | 212 | 102 | 9063 | 242 | 1792 | 107 | 108 | 9447 | 197 | 1738 | 156 | 99 | 8232 | 255 | 1857 | 166 | 99 | 7823 | 234 | 1949 |
| Japan | Kyushu | | | Nagasaki | 32.7822 | 129.8581 | 235 | 77 | 8540 | 235 | 1749 | 99 | 79 | 9048 | 181 | 1657 | 158 | 74 | 7715 | 250 | 1807 | 168 | 73 | 7344 | 258 | 1914 |
| Japan | Kyushu | | | Kumamoto | 32.7942 | 130.7518 | 211 | 102 | 9104 | 242 | 1795 | 106 | 108 | 9457 | 196 | 1738 | 155 | 99 | 8270 | 255 | 1860 | 165 | 99 | 7866 | 234 | 1952 |
| Japan | Kyushu | | | Kumamoto | 32.7991 | 130.7419 | 209 | 102 | 9058 | 241 | 1783 | 106 | 107 | 9464 | 196 | 1730 | 155 | 99 | 8212 | 255 | 1848 | 165 | 99 | 7806 | 233 | 1941 |
| Japan | Kyushu | | | Kumamoto | 32.8068 | 130.7017 | 208 | 101 | 9064 | 241 | 1777 | 106 | 106 | 9462 | 195 | 1728 | 155 | 98 | 8225 | 255 | 1842 | 166 | 98 | 7821 | 233 | 1935 |
| Japan | Kyushu | | | Kumamoto | 32.8186 | 130.734 | 208 | 102 | 9079 | 241 | 1773 | 106 | 107 | 9468 | 196 | 1727 | 156 | 99 | 8243 | 256 | 1839 | 166 | 99 | 7837 | 234 | 1932 |
| Japan | Kyushu | | | Kumamoto | 32.8982 | 130.5472 | 202 | 98 | 9029 | 241 | 1672 | 104 | 103 | 9393 | 193 | 1610 | 156 | 95 | 8165 | 255 | 1740 | 166 | 95 | 7775 | 233 | 1833 |
| Japan | Kyushu | | | Kumamoto | 32.9723 | 130.4471 | 198 | 95 | 8972 | 240 | 1609 | 102 | 99 | 9324 | 220 | 1550 | 155 | 92 | 8151 | 254 | 1681 | 165 | 92 | 7730 | 261 | 1773 |
| Japan | Kyushu | | | Saga | 33.1021 | 129.9961 | 222 | 82 | 8851 | 231 | 1735 | 88 | 83 | 9086 | 171 | 1641 | 149 | 79 | 7951 | 245 | 1778 | 160 | 79 | 7599 | 253 | 1902 |
| Japan | Kyushu | | | Oita | 33.1149 | 131.6791 | 186 | 91 | 8723 | 257 | 1687 | 99 | 98 | 8969 | 214 | 1671 | 146 | 88 | 7879 | 241 | 1762 | 156 | 88 | 7437 | 248 | 1842 |
| Japan | Kyushu | | | Oita | 33.1197 | 131.6803 | 186 | 91 | 8723 | 257 | 1687 | 99 | 98 | 8969 | 214 | 1671 | 146 | 88 | 7879 | 241 | 1762 | 156 | 88 | 7437 | 248 | 1842 |
| Japan | Kyushu | | | Fukuoka | 33.2077 | 130.5108 | 202 | 96 | 9151 | 238 | 1655 | 97 | 100 | 9393 | 216 | 1565 | 151 | 93 | 8251 | 252 | 1711 | 161 | 93 | 7863 | 260 | 1821 |
| Japan | Kyushu | | | Fukuoka | 33.3063 | 130.5364 | 206 | 96 | 9140 | 236 | 1662 | 94 | 99 | 9376 | 213 | 1561 | 149 | 93 | 8245 | 250 | 1711 | 159 | 93 | 7840 | 258 | 1827 |
| Japan | Kyushu | | | Saga | 33.3136 | 130.2921 | 207 | 88 | 9021 | 239 | 1665 | 96 | 91 | 9210 | 181 | 1543 | 153 | 85 | 8128 | 253 | 1714 | 163 | 85 | 7709 | 260 | 1835 |
| Japan | Kyushu | | | Saga | 33.321 | 130.2738 | 209 | 88 | 9003 | 238 | 1659 | 93 | 89 | 9189 | 184 | 1567 | 153 | 85 | 8116 | 252 | 1710 | 164 | 85 | 7730 | 260 | 1830 |
| Japan | Kyushu | | | Fukuoka | 33.3402 | 130.5678 | 207 | 96 | 9162 | 236 | 1646 | 94 | 99 | 9350 | 194 | 1544 | 149 | 93 | 8274 | 251 | 1691 | 159 | 93 | 7860 | 258 | 1813 |
| Japan | Kyushu | | | Fukuoka | 33.5273 | 130.4065 | 222 | 84 | 8962 | 232 | 1613 | 89 | 86 | 9051 | 204 | 1456 | 147 | 81 | 8033 | 246 | 1654 | 157 | 81 | 7622 | 253 | 1785 |
| Japan | Kyushu | | | Fukuoka | 33.532 | 130.3851 | 217 | 83 | 8968 | 236 | 1554 | 89 | 85 | 9029 | 204 | 1461 | 151 | 80 | 8046 | 250 | 1601 | 161 | 80 | 7641 | 257 | 1727 |
| Japan | Kyushu | | | Fukuoka | 33.5537 | 130.4551 | 216 | 85 | 8964 | 237 | 1497 | 94 | 88 | 9069 | 197 | 1379 | 152 | 82 | 8066 | 251 | 1550 | 162 | 82 | 7626 | 258 | 1670 |
| Japan | Kyushu | | | Fukuoka | 33.5565 | 130.3856 | 215 | 82 | 8913 | 239 | 1505 | 94 | 84 | 8997 | 208 | 1392 | 154 | 79 | 7984 | 253 | 1557 | 164 | 79 | 7570 | 259 | 1678 |
| Japan | Kyushu | | | Fukuoka | 33.5638 | 130.3457 | 215 | 81 | 8883 | 238 | 1513 | 96 | 83 | 8936 | 210 | 1376 | 155 | 78 | 7960 | 253 | 1563 | 165 | 78 | 7533 | 259 | 1685 |
| Japan | Kyushu | | | Fukuoka | 33.5766 | 130.3408 | 216 | 81 | 8881 | 238 | 1509 | 96 | 83 | 8922 | 209 | 1375 | 155 | 78 | 7969 | 253 | 1561 | 165 | 78 | 7534 | 260 | 1683 |
| Japan | Kyushu | | | Fukuoka | 33.5878 | 130.3852 | 216 | 81 | 8854 | 238 | 1493 | 96 | 83 | 8947 | 209 | 1356 | 155 | 78 | 7932 | 252 | 1540 | 165 | 78 | 7498 | 259 | 1666 |
| Japan | Kyushu | | | Fukuoka | 33.6115 | 130.4235 | 218 | 83 | 8906 | 238 | 1475 | 95 | 84 | 8945 | 210 | 1336 | 154 | 79 | 7978 | 252 | 1527 | 164 | 79 | 7567 | 259 | 1648 |
| Japan | Kyushu | | | Fukuoka | 33.6193 | 130.4339 | 218 | 83 | 8887 | 238 | 1470 | 95 | 85 | 8939 | 209 | 1334 | 154 | 79 | 7955 | 252 | 1522 | 164 | 79 | 7537 | 259 | 1643 |
| Japan | Kyushu | | | Fukuoka | 33.747 | 130.4836 | 230 | 81 | 8809 | 234 | 1516 | 93 | 84 | 8795 | 192 | 1360 | 151 | 78 | 7867 | 248 | 1559 | 161 | 78 | 7416 | 254 | 1692 |
| Japan | Kyushu | | | Tsushima Island | 34.6376 | 129.3966 | 177 | 75 | 9037 | 250 | 1545 | 66 | 76 | 8608 | 172 | 1364 | 135 | 72 | 7939 | 241 | 1543 | 146 | 72 | 7543 | 244 | 1746 |
| Japan | Kyushu | | | Tsushima Island | 34.6437 | 129.3231 | 172 | 76 | 9068 | 250 | 1561 | 67 | 76 | 8647 | 173 | 1382 | 136 | 72 | 7981 | 241 | 1556 | 146 | 72 | 7574 | 244 | 1762 |
| Japan | Kyushu | | | Tsushima Island | 34.6564 | 129.4771 | 178 | 75 | 8998 | 250 | 1509 | 70 | 76 | 8532 | 174 | 1307 | 136 | 72 | 7916 | 242 | 1510 | 146 | 72 | 7499 | 244 | 1711 |
| Japan | Kyushu | | | Tsushima Island | 34.6585 | 129.4701 | 178 | 75 | 9014 | 250 | 1514 | 69 | 76 | 8535 | 173 | 1312 | 136 | 71 | 7935 | 241 | 1515 | 146 | 71 | 7523 | 244 | 1716 |
| Japan | Kyushu | | | Hokkaido | 42.1623 | 142.7785 | 66 | 76 | 9959 | 191 | 998 | -5 | 90 | 10462 | 122 | 1057 | 66 | 71 | 8793 | 165 | 1086 | 77 | 70 | 8031 | 183 | 1142 |
| Japan | Kyushu | | | Hokkaido | 42.1705 | 142.8583 | 71 | 78 | 9989 | 190 | 1012 | -7 | 91 | 10430 | 120 | 1066 | 65 | 73 | 8848 | 165 | 1104 | 76 | 73 | 8043 | 181 | 1158 |
| Japan | Kyushu | | | Hokkaido | 42.2107 | 142.6914 | 67 | 78 | 10184 | 193 | 986 | -4 | 92 | 10715 | 125 | 1032 | 67 | 73 | 9062 | 167 | 1079 | 77 | 73 | 8239 | 185 | 1130 |
| Japan | Shikoku | | | Ehime | 33.2397 | 132.5521 | 218 | 92 | 8411 | 262 | 1574 | 105 | 101 | 8732 | 214 | 1597 | 154 | 89 | 7565 | 244 | 1656 | 165 | 89 | 7125 | 251 | 1722 |
| Japan | Shikoku | | | Kochi | 33.5241 | 133.5767 | 235 | 90 | 8544 | 265 | 2361 | 99 | 138 | 9713 | 217 | 2397 | 157 | 86 | 7630 | 247 | 2400 | 167 | 86 | 7249 | 255 | 2501 |
| Japan | Shikoku | | | Kochi | 33.5536 | 133.4823 | 229 | 92 | 8625 | 190 | 2279 | 97 | 136 | 9723 | 219 | 2298 | 156 | 88 | 7704 | 247 | 2315 | 166 | 89 | 7314 | 227 | 2419 |
| Japan | Shikoku | | | Ehime | 33.7179 | 132.7075 | 198 | 86 | 8961 | 175 | 1405 | 89 | 100 | 9359 | 178 | 1447 | 143 | 82 | 8136 | 208 | 1477 | 153 | 83 | 7648 | 217 | 1553 |
| Japan | Shikoku | | | Ehime | 33.8326 | 132.7908 | 184 | 85 | 8982 | 183 | 1249 | 98 | 102 | 9445 | 187 | 1281 | 150 | 81 | 8184 | 216 | 1323 | 160 | 82 | 7669 | 224 | 1394 |
| Japan | Shikoku | | | Ehime | 33.8454 | 132.8037 | 185 | 85 | 9001 | 180 | 1282 | 95 | 102 | 9473 | 184 | 1318 | 148 | 82 | 8227 | 213 | 1353 | 157 | 82 | 7706 | 222 | 1427 |
| Japan | Shikoku | | | Ehime | 33.8549 | 132.7554 | 181 | 85 | 8981 | 181 | 1241 | 99 | 101 | 9410 | 188 | 1254 | 150 | 81 | 8194 | 215 | 1315 | 160 | 82 | 7661 | 223 | 1387 |
| Japan | Shikoku | | | Ehime | 33.9056 | 133.1914 | 173 | 91 | 8989 | 184 | 1436 | 94 | 117 | 9658 | 186 | 1484 | 151 | 87 | 8161 | 216 | 1500 | 161 | 88 | 7682 | 225 | 1580 |
| Japan | Shikoku | | | Kagawa | 34.0234 | 133.9605 | 181 | 82 | 9016 | 238 | 1636 | 73 | 105 | 9603 | 195 | 1638 | 123 | 78 | 8182 | 222 | 1696 | 133 | 79 | 7693 | 228 | 1772 |
| Japan | Shikoku | | | Tokushima | 34.0691 | 134.3662 | 169 | 82 | 8810 | 228 | 1457 | 95 | 98 | 9330 | 210 | 1525 | 149 | 78 | 7979 | 254 | 1524 | 159 | 79 | 7476 | 257 | 1590 |
| Japan | Shikoku | | | Kagawa | 34.089 | 133.6735 | 156 | 89 | 8999 | 180 | 1297 | 91 | 110 | 9585 | 214 | 1358 | 148 | 84 | 8195 | 247 | 1369 | 157 | 85 | 7699 | 221 | 1435 |
| Japan | Shikoku | | | Kagawa | 34.1066 | 133.7615 | 154 | 87 | 8999 | 179 | 1264 | 89 | 106 | 9579 | 211 | 1349 | 146 | 83 | 8184 | 245 | 1338 | 156 | 84 | 7681 | 220 | 1403 |
| Japan | Shikoku | | | Kagawa | 34.1102 | 133.7836 | 156 | 87 | 9032 | 175 | 1304 | 86 | 106 | 9588 | 208 | 1381 | 142 | 83 | 8185 | 241 | 1376 | 151 | 84 | 7700 | 216 | 1441 |
| Japan | Shikoku | | | Tokushima | 34.1405 | 134.4536 | 162 | 84 | 8889 | 229 | 1365 | 95 | 95 | 9377 | 211 | 1441 | 149 | 80 | 8093 | 255 | 1435 | 160 | 80 | 7578 | 258 | 1498 |
| Japan | Shikoku | | | Kagawa | 34.169 | 133.8611 | 151 | 87 | 9086 | 219 | 1231 | 85 | 105 | 9580 | 207 | 1308 | 140 | 83 | 8248 | 241 | 1306 | 150 | 84 | 7765 | 216 | 1368 |
| Japan | Shikoku | | | Kagawa | 34.1762 | 133.8559 | 167 | 88 | 9078 | 222 | 1190 | 88 | 104 | 9571 | 208 | 1270 | 143 | 83 | 8271 | 243 | 1265 | 152 | 84 | 7764 | 217 | 1326 |
| Japan | Shikoku | | | Kagawa | 34.1883 | 133.8216 | 147 | 87 | 9076 | 225 | 1145 | 88 | 103 | 9556 | 210 | 1232 | 145 | 83 | 8264 | 245 | 1222 | 154 | 84 | 7765 | 219 | 1282 |
| Japan | Shikoku | | | Kagawa | 34.1895 | 133.8301 | 147 | 87 | 9079 | 224 | 1146 | 89 | 103 | 9557 | 210 | 1229 | 145 | 83 | 8266 | 245 | 1223 | 154 | 84 | 7779 | 219 | 1283 |
| Japan | Shikoku | | | Kagawa | 34.2112 | 133.6949 | 159 | 88 | 9082 | 180 | 1120 | 93 | 104 | 9514 | 204 | 1184 | 148 | 84 | 8273 | 214 | 1196 | 158 | 85 | 7766 | 222 | 1257 |
| Japan | Shikoku | | | Kagawa | 34.2157 | 133.7165 | 158 | 88 | 9066 | 170 | 1104 | 92 | 103 | 9522 | 206 | 1174 | 148 | 84 | 8253 | 213 | 1183 | 158 | 84 | 7735 | 222 | 1242 |
| Japan | Shikoku | | | Kagawa | 34.2238 | 133.777 | 155 | 87 | 9105 | 169 | 1085 | 93 | 103 | 9554 | 212 | 1152 | 147 | 83 | 8306 | 248 | 1163 | 156 | 84 | 7808 | 221 | 1223 |
| Japan | Shikoku | | | Kagawa | 34.2238 | 133.7445 | 145 | 88 | 9119 | 176 | 1127 | 92 | 103 | 9542 | 213 | 1164 | 143 | 84 | 8292 | 244 | 1204 | 153 | 84 | 7776 | 218 | 1264 |
| Japan | Shikoku | | | Kagawa | 34.2322 | 133.6087 | 144 | 90 | 9125 | 180 | 1128 | 92 | 106 | 9610 | 182 | 1187 | 148 | 86 | 8325 | 214 | 1202 | 157 | 86 | 7814 | 222 | 1265 |
| Japan | Shikoku | | | Kagawa | 34.2385 | 133.8985 | 154 | 88 | 9146 | 168 | 1070 | 91 | 103 | 9582 | 210 | 1155 | 146 | 84 | 8341 | 248 | 1147 | 156 | 85 | 7817 | 221 | 1205 |
| Japan | Shikoku | | | Kagawa | 34.2392 | 133.9148 | 156 | 89 | 9127 | 167 | 1078 | 91 | 103 | 9580 | 210 | 1154 | 146 | 84 | 8317 | 248 | 1156 | 155 | 85 | 7800 | 221 | 1213 |
| Japan | Shikoku | | | Kagawa | 34.2429 | 133.7589 | 153 | 87 | 9107 | 170 | 1063 | 93 | 102 | 9534 | 211 | 1131 | 148 | 83 | 8306 | 213 | 1141 | 157 | 84 | 7801 | 222 | 1200 |
| Japan | Shikoku | | | Kagawa | 34.2435 | 133.9514 | 144 | 89 | 9102 | 222 | 1112 | 91 | 104 | 9573 | 210 | 1159 | 143 | 85 | 8305 | 244 | 1191 | 153 | 85 | 7788 | 218 | 1249 |
| Japan | Shikoku | | | Kagawa | 34.248 | 133.8147 | 151 | 87 | 9154 | 169 | 1048 | 95 | 102 | 9550 | 214 | 1096 | 147 | 83 | 8354 | 249 | 1129 | 157 | 84 | 7844 | 222 | 1185 |
| Japan | Shikoku | | | Kagawa | 34.2558 | 133.7941 | 149 | 87 | 9149 | 170 | 1034 | 95 | 101 | 9537 | 215 | 1087 | 148 | 83 | 8339 | 249 | 1113 | 157 | 84 | 7806 | 222 | 1171 |
| Japan | Shikoku | | | Kagawa | 34.2565 | 133.8288 | 149 | 88 | 9156 | 170 | 1032 | 95 | 101 | 9561 | 214 | 1088 | 148 | 84 | 8358 | 250 | 1112 | 157 | 85 | 7820 | 222 | 1170 |
| Japan | Shikoku | | | Kagawa | 34.2569 | 133.7454 | 151 | 87 | 9107 | 170 | 1047 | 94 | 101 | 9504 | 203 | 1108 | 148 | 83 | 8298 | 214 | 1125 | 158 | 84 | 7784 | 222 | 1183 |
| Japan | Shikoku | | | Kagawa | 34.2659 | 134.0186 | 143 | 90 | 9099 | 163 | 1097 | 90 | 104 | 9551 | 208 | 1158 | 143 | 86 | 8289 | 211 | 1172 | 153 | 87 | 7787 | 219 | 1233 |
| Japan | Shikoku | | | Kagawa | 34.2677 | 133.8787 | 151 | 88 | 9196 | 168 | 1044 | 92 | 101 | 9575 | 211 | 1114 | 146 | 84 | 8372 | 248 | 1122 | 155 | 85 | 7875 | 221 | 1180 |
| Japan | Shikoku | | | Kagawa | 34.2736 | 134.1013 | 146 | 90 | 8984 | 164 | 1097 | 91 | 105 | 9476 | 208 | 1156 | 144 | 86 | 8180 | 210 | 1173 | 154 | 87 | 7666 | 219 | 1233 |
| Japan | Shikoku | | | Kagawa | 34.2736 | 133.8303 | 146 | 88 | 9188 | 170 | 1007 | 96 | 100 | 9561 | 215 | 1062 | 148 | 84 | 8388 | 250 | 1086 | 157 | 85 | 7857 | 223 | 1144 |
| Japan | Shikoku | | | Kagawa | 34.2787 | 133.7865 | 148 | 88 | 9156 | 170 | 1018 | 96 | 99 | 9518 | 215 | 1063 | 148 | 84 | 8354 | 250 | 1097 | 157 | 84 | 7844 | 222 | 1155 |
| Japan | Shikoku | | | Kagawa | 34.2811 | 133.811 | 145 | 88 | 9209 | 170 | 1000 | 96 | 100 | 9555 | 216 | 1050 | 148 | 84 | 8409 | 251 | 1080 | 158 | 85 | 7878 | 224 | 1137 |
| Japan | Shikoku | | | Kagawa | 34.2878 | 134.1269 | 146 | 91 | 8986 | 164 | 1099 | 90 | 105 | 9499 | 207 | 1170 | 144 | 86 | 8199 | 210 | 1174 | 154 | 87 | 7678 | 219 | 1234 |
| Japan | Shikoku | | | Kagawa | 34.301 | 133.8583 | 144 | 89 | 9234 | 169 | 996 | 95 | 102 | 9606 | 215 | 1053 | 147 | 85 | 8413 | 250 | 1079 | 157 | 85 | 7898 | 223 | 1134 |
| Japan | Shikoku | | | Kagawa | 34.3025 | 133.9651 | 140 | 90 | 9189 | 167 | 1039 | 90 | 103 | 9609 | 208 | 1136 | 146 | 86 | 8373 | 214 | 1117 | 156 | 87 | 7851 | 222 | 1174 |
| Japan | Shikoku | | | Kagawa | 34.3048 | 133.8301 | 143 | 89 | 9255 | 169 | 988 | 96 | 101 | 9588 | 216 | 1040 | 147 | 84 | 8452 | 251 | 1071 | 157 | 85 | 7922 | 223 | 1126 |
| Japan | Shikoku | | | Kagawa | 34.3118 | 134.1178 | 145 | 91 | 9018 | 163 | 1081 | 91 | 106 | 9522 | 208 | 1148 | 143 | 87 | 8221 | 210 | 1156 | 153 | 87 | 7688 | 219 | 1216 |
| Japan | Shikoku | | | Kagawa | 34.3197 | 134.0771 | 144 | 91 | 9067 | 164 | 1057 | 92 | 106 | 9558 | 210 | 1117 | 145 | 87 | 8238 | 212 | 1134 | 154 | 88 | 7737 | 221 | 1192 |
| Japan | Shikoku | | | Kagawa | 34.3281 | 134.9064 | 196 | 74 | 8887 | 220 | 1431 | 92 | 80 | 9273 | 207 | 1442 | 141 | 69 | 8144 | 238 | 1491 | 151 | 69 | 7552 | 214 | 1562 |
| Japan | Shikoku | | | Kagawa | 34.3328 | 134.1431 | 143 | 91 | 9059 | 163 | 1088 | 89 | 106 | 9583 | 207 | 1166 | 143 | 87 | 8250 | 211 | 1164 | 153 | 87 | 7744 | 219 | 1223 |
| Japan | Shikoku | | | Kagawa | 34.349 | 133.9905 | 140 | 91 | 9257 | 162 | 1054 | 91 | 104 | 9675 | 210 | 1102 | 142 | 86 | 8420 | 211 | 1130 | 152 | 87 | 7925 | 219 | 1190 |
| Japan | Shikoku | | | Kagawa | 34.3913 | 134.0529 | 141 | 92 | 9204 | 166 | 1032 | 93 | 106 | 9681 | 212 | 1091 | 146 | 88 | 8392 | 215 | 1109 | 155 | 89 | 7880 | 223 | 1167 |
| Korea | Busan | | | Busan | 35.0876 | 129.0057 | 99 | 84 | 9375 | 253 | 1231 | 69 | 85 | 9007 | 177 | 1205 | 136 | 80 | 8284 | 233 | 1263 | 146 | 80 | 7818 | 240 | 1443 |
| Korea | Busan | | | Busan | 35.1041 | 129.0239 | 99 | 83 | 9337 | 253 | 1221 | 68 | 84 | 8955 | 176 | 1197 | 135 | 80 | 8257 | 233 | 1254 | 146 | 80 | 7786 | 239 | 1433 |
| Korea | Busan | | | Busan | 35.1052 | 129.0338 | 100 | 81 | 9344 | 251 | 1239 | 68 | 84 | 8948 | 176 | 1187 | 134 | 78 | 8218 | 231 | 1270 | 144 | 78 | 7774 | 238 | 1451 |
| Korea | Busan | | | Busan | 35.1065 | 128.9982 | 101 | 83 | 9407 | 248 | 1286 | 67 | 86 | 9045 | 176 | 1214 | 130 | 79 | 8330 | 228 | 1310 | 140 | 79 | 7874 | 234 | 1498 |
| Korea | Busan | | | Busan | 35.112 | 128.9673 | 97 | 86 | 9434 | 254 | 1230 | 68 | 89 | 9125 | 178 | 1211 | 136 | 83 | 8356 | 234 | 1263 | 146 | 83 | 7876 | 241 | 1442 |
| Korea | Busan | | | Busan | 35.1198 | 129.0307 | 101 | 82 | 9349 | 248 | 1265 | 67 | 85 | 8972 | 175 | 1187 | 130 | 78 | 8267 | 227 | 1292 | 140 | 78 | 7813 | 234 | 1477 |
| Korea | Busan | | | Busan | 35.1219 | 129.0168 | 100 | 83 | 9408 | 247 | 1269 | 66 | 86 | 9030 | 175 | 1200 | 130 | 79 | 8319 | 227 | 1294 | 140 | 79 | 7852 | 234 | 1480 |
| Korea | Busan | | | Busan | 35.1406 | 129.0527 | 99 | 85 | 9392 | 252 | 1168 | 67 | 86 | 9002 | 175 | 1145 | 135 | 81 | 8265 | 232 | 1209 | 145 | 81 | 7816 | 239 | 1380 |
| Korea | Busan | | | Busan | 35.1991 | 129.0307 | 109 | 87 | 9732 | 233 | 1346 | 59 | 90 | 9185 | 170 | 1180 | 110 | 83 | 8595 | 213 | 1364 | 120 | 84 | 8132 | 219 | 1560 |
| Korea | Busan | | | Busan | 35.2212 | 129.0747 | 94 | 87 | 9542 | 249 | 1155 | 58 | 91 | 9182 | 169 | 1153 | 129 | 84 | 8409 | 229 | 1198 | 139 | 84 | 7947 | 235 | 1369 |
| Korea | Busan | | | Busan | 35.2632 | 129.0834 | 94 | 89 | 9650 | 246 | 1175 | 53 | 92 | 9251 | 165 | 1166 | 125 | 86 | 8527 | 226 | 1216 | 135 | 86 | 8040 | 232 | 1388 |
| Korea | Geyongnam | | | Changwon | 35.2051 | 128.5748 | 78 | 106 | 10064 | 257 | 1213 | 65 | 111 | 9961 | 186 | 1264 | 131 | 102 | 9009 | 239 | 1250 | 140 | 103 | 8502 | 245 | 1425 |
| Korea | Geyongnam | | | Changwon | 35.2317 | 128.5841 | 77 | 108 | 10066 | 258 | 1193 | 65 | 112 | 10003 | 187 | 1247 | 131 | 103 | 9017 | 240 | 1232 | 141 | 104 | 8514 | 245 | 1405 |
| Korea | Geyongnam | | | Kimhae | 35.3317 | 128.7588 | 71 | 110 | 10168 | 259 | 1115 | 67 | 114 | 9936 | 188 | 1136 | 130 | 106 | 9053 | 240 | 1164 | 141 | 106 | 8535 | 246 | 1332 |
| Korea | Jeonnam | | | Mokpo | 34.7888 | 126.391 | 87 | 94 | 9681 | 252 | 941 | 75 | 167 | 12536 | 226 | 1255 | 133 | 88 | 8847 | 239 | 1020 | 142 | 89 | 8388 | 245 | 1141 |

**Table S5.** Contributions of each climate variable on the models, Bio 1, annual temperature; Bio 2, mean diurnal range; Bio 4, temperature seasonality; Bio 8, mean temperature of wettest quarter; Bio 12, annual precipitation. AUC: Area under the curve. Years before present for last interglacial maximum, last glacial maximum, and mid-Holocene are 130 Kyr, 21 Kyr, and 6 Kyr, respectively.

| Period  (AUC)  Variable | Last interglacial maximum  (0.906) | Last glacial maximum  (0.909) | Mid-Holocene (0.903) | Present  (0.908) |
| --- | --- | --- | --- | --- |
| Bio1 | 29.3 | 26.6 | 29.2 | 28.8 |
| Bio2 | 5.5 | 6.1 | 6.2 | 6.4 |
| Bio4 | 36.7 | 41.2 | 38.7 | 38.9 |
| Bio8 | 7.7 | 7.3 | 7.6 | 7.0 |
| Bio12 | 20.8 | 18.9 | 18.2 | 19.0 |

**Fig. S1.** Changes of △*K* as a function of *K* (the number of clusters) in STRUCTURE analysis.


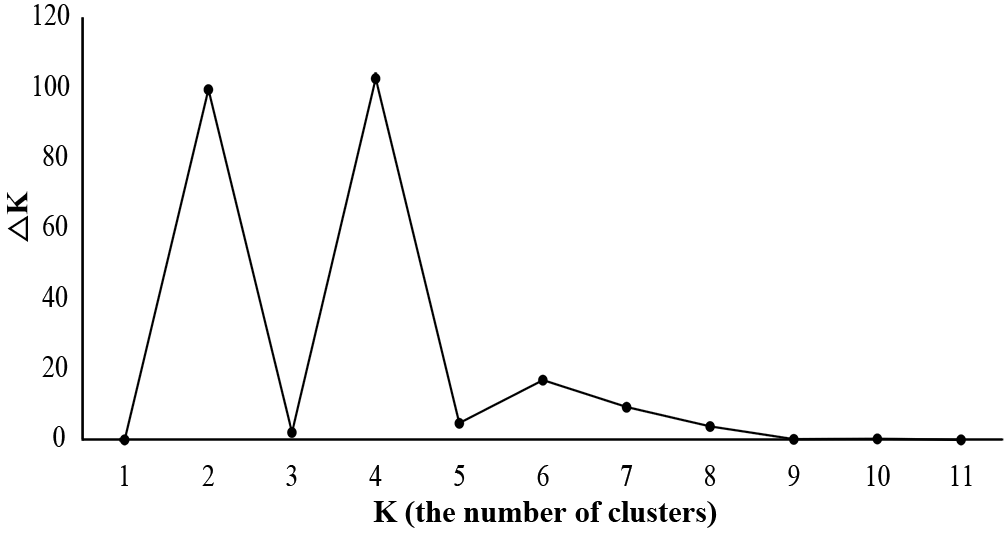

Supplement: Supplementary file 1 [file 22114212]
